# Supplementary material for: Plasma-based early screening and monitoring of EGFR mutations in NSCLC patients by a 3-color digital PCR assay
Source: PubMed Central journal article supplement (PMC7592053; doi:10.1038/s41416-020-1024-2), 2020-08-12
Supplement: 41416_2020_1024_MOESM1_ESM.pdf [file 41416_2020_1024_MOESM1_ESM.pdf]

Supplementary

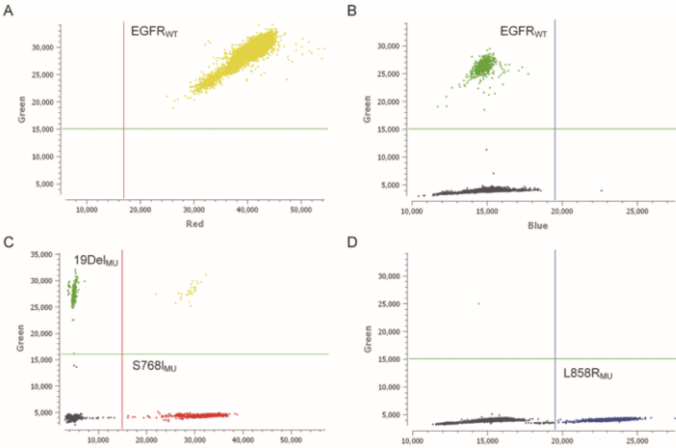

Fig. S1. The specificity of EGFR L858R, S768I and 19Del within the dEGFR39 assay. The specific detection is completed in two PCR wells, with both reactions containing all primer probes. (A) and (B) are 2D images of dPCR reactions containing only wild-type DNA; (C) and (D) are 2D images of dPCR reactions containing only L858R, S768I and 19Del mutant plasmids.

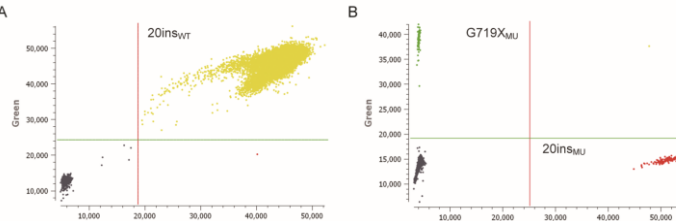

Fig. S2. The specificity of EGFR G719X and 20ins within dEGFR39 assay in a 2D plot. The specific detection is completed in two PCR wells, with both reactions containing all primer probes. (A) is a 2D image of dPCR reactions containing only wild-type DNA; (B) is a 2D image of dPCR reactions containing only G719X and 20ins mutant plasmids.

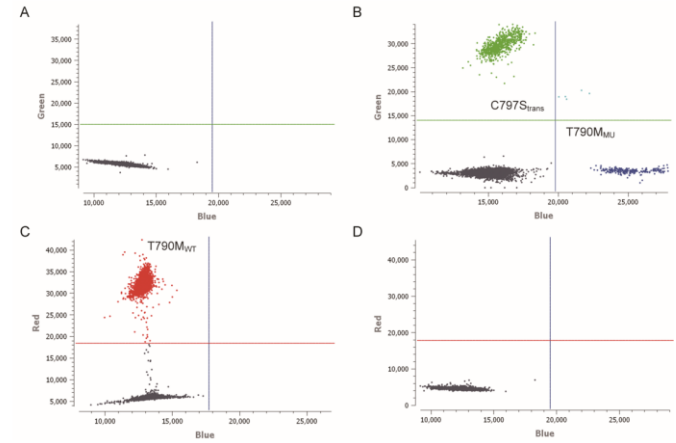

Fig. S3. The specificity of EGFR T790M and C797S within dEGFR39 assay in a 2D plot. The specific detection is completed in two PCR wells, with both reactions containing all primer probes. (A) and (B) are 2D images of dPCR reactions containing only wild-type DNA; (C) and (D) are 2D images of dPCR reactions containing only T790M and C797S mutant plasmids.

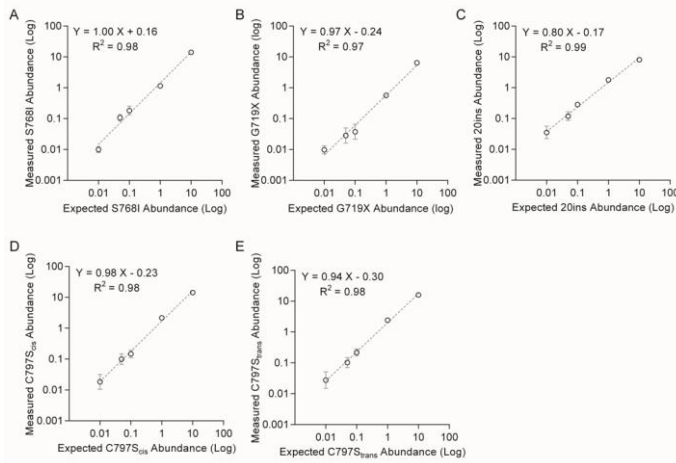

Fig. S4. The linearity of EGFR S768I, 20ins, G719X and C797S in dEGFR39 assay. EGFR mutations were detected on a series of DNA with a mutant ratio of 10%, 1%, 0.1%, 0.05% and 0.01%. A regression plot for the dilutions shows linearity and a good correlation for expected and measured values.

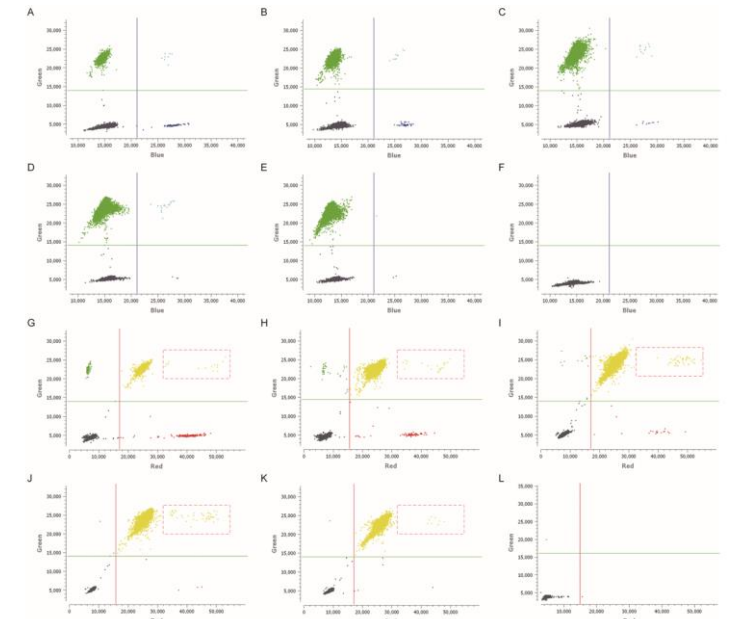

Fig. S5. The sensitivity of EGFR L858R, S768I and 19Del within dEGFR39 assay in a 2D plot. EGFR mutations were detected on a series of DNA with a mutant ratio of 10%, 1%, 0.1%, 0.05%, 0.01% and NTC. (A) to (F) are the dPCR results in 2D dot-plots of HEX (Green) and FAM (Blue) channels; (G) to (L) are the dPCR results in 2D dot-plots of HEX (Green) and CY5 (Red) channels.

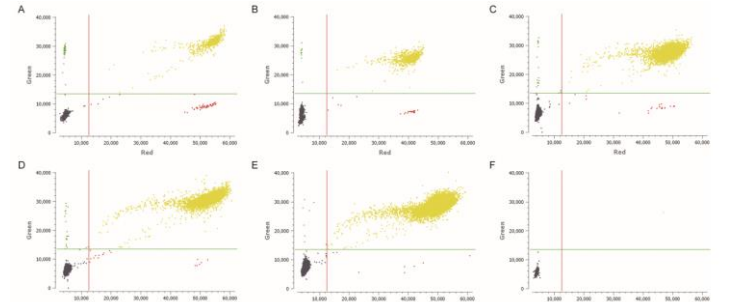

Fig. S6. The sensitivity of EGFR G719X and 20ins within dEGFR39 assay in a 2D plot. (A) to (F) are the dPCR results of HEX (Green) and FAM (Blue) channels with a mutant ratio of 10%, 1%, 0.1%, 0.05%, 0.01% and NTC.

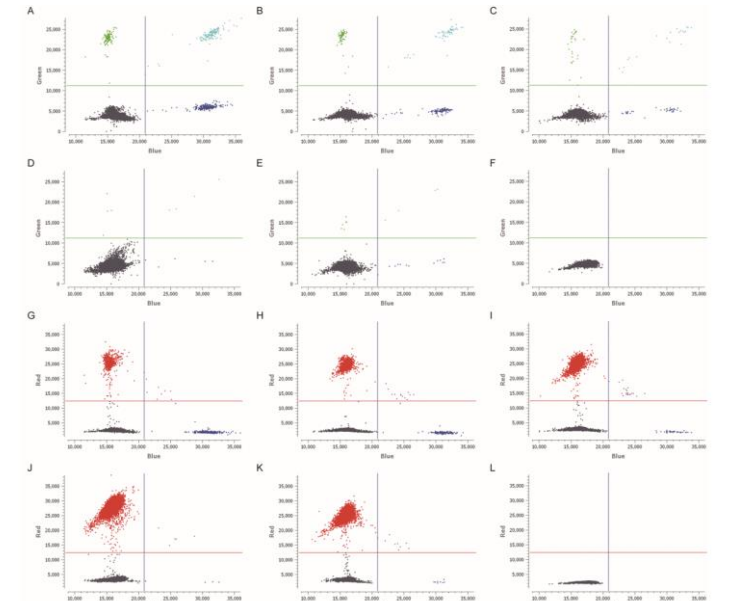

Fig. S7. The sensitivity of EGFR T790M and C797S within dEGFR39 assay in a 2D plot. EGFR mutations were detected on a series of DNA with a mutant ratio of 10%, 1%, 0.1%, 0.05%, 0.01% and NTC. (A) to (F) are the dPCR results in 2D dot-plots of HEX (Green) and FAM (Blue) channels; (G) to (L) are the dPCR results in 2D dot-plots of FAM (Blue) and CY5 (Red) channels.

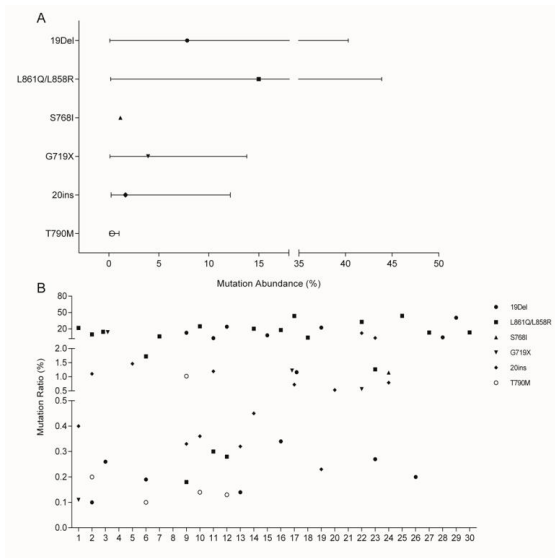

Fig. S8. Longitudinal analysis of mutant abundance in 30 NSCLC patients.

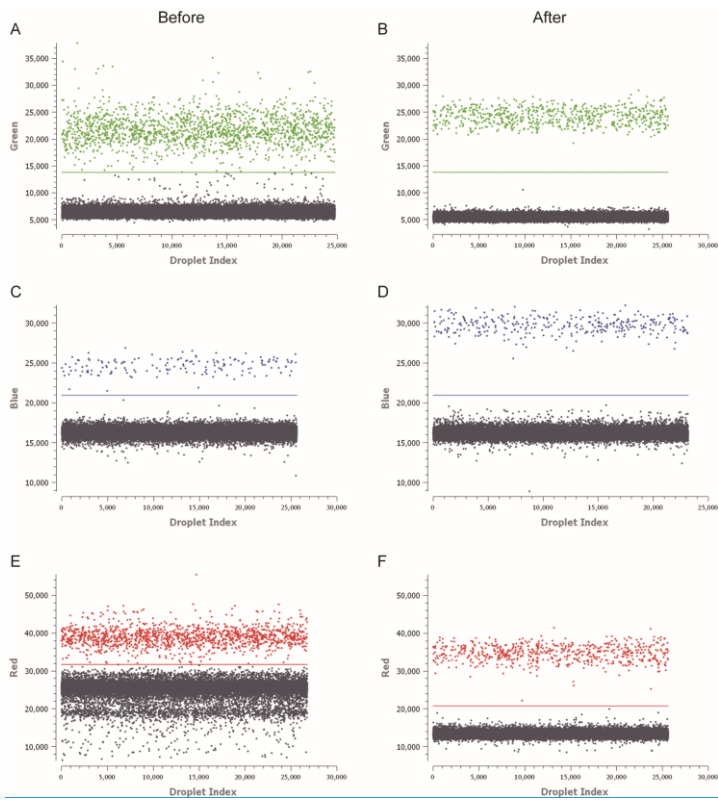

Fig. S9. Optimisation of signal partition in a multiplex dPCR assay. Optimisation of dEGFR39 assay for annealing temperature are shown in (A) and (B), concentrations in (C) and (D), and combinations in (E) and (F).

Table S1. The locus information of deGFR39 assay.

| Exon   | Amino acid change         | Mutation site        | COSMIC | Sequence                                                                                                                                                                                                                                                                                      |
|--------|---------------------------|----------------------|--------|-----------------------------------------------------------------------------------------------------------------------------------------------------------------------------------------------------------------------------------------------------------------------------------------------|
| Exon18 | c.2155G>A                 | p.G719S              | 6252   | CTTCCAGCATGGTGAGGGCTGAGGTGACCCCTGTCTGTGTTCTTGTCCCCAGCTTGTGGAGCCTTACACCCAGTGGAGAAGCTCCCAACCAAGCTCTTGAGGATCTTGAAGGAAACTGAATTCAAAAAGATCAAAGTGCTGAGCTCCGGTGCCTCCGGCAGCGGTATAAGGTAAGGTCCCTGGCACAGGCCTCTGGCTGGGCCGAGGGCCTCATGGTCTGGTGGGGAGCCAGAGTCTTGAAGCTGTATTTCCATCATCTACTTTACTCTTTGTTTCACTGA     |
| Exon18 | c.2155G>T                 | p.G719C              | 6253   | CTTCCAGCATGGTGAGGGCTGAGGTGACCCCTGTCTGTGTTCTTGTCCCCAGCTTGTGGAGCCTTACACCCAGTGGAGAAGCTCCCAACCAAGCTCTTGAGGATCTTGAAGGAAACTGAATTCAAAAAGATCAAAGTGCTGTGCTCCGGTGCCTCCGGCAGCGGTATAAGGTAAGGTCCCTGGCACAGGCCTCTGGCTGGGCCGAGGGCCTCATGGTCTGGTGGGGAGCCAGAGTCTTGAAGCTGTATTTCCATCATCTACTTTACTCTTTGTTTCACTGA     |
| Exon18 | c.2156G>C                 | p.G719A              | 6239   | CTTCCAGCATGGTGAGGGCTGAGGTGACCCCTGTCTGTGTTCTTGTCCCCAGCTTGTGGAGCCTTACACCCAGTGGAGAAGCTCCCAACCAAGCTCTTGAGGATCTTGAAGGAAACTGAATTCAAAAAGATCAAAGTGCTGGCCTCCGGTGCCTCCGGCAGCGGTATAAGGTAAGGTCCCTGGCACAGGCCTCTGGCTGGGCCGAGGGCCTCATGGTCTGGTGGGGAGCCAGAGTCTTGAAGCTGTATTTCCATCATCTACTTTACTCTTTGTTTCACTGA     |
| Exon18 | c.2156G>A                 | p.G719D              | 18425  | CTTCCAGCATGGTGAGGGCTGAGGTGACCCCTGTCTGTGTTCTTGTCCCCAGCTTGTGGAGCCTTACACCCAGTGGAGAAGCTCCCAACCAAGCTCTTGAGGATCTTGAAGGAAACTGAATTCAAAAAGATCAAAGTGCTGGACTCCGGTGCCTCCGGCAGCGGTATAAGGTAAGGTCCCTGGCACAGGCCTCTGGCTGGGCCGAGGGCCTCATGGTCTGGTGGGGAGCCAGAGTCTTGAAGCTGTATTTCCATCATCTACTTTACTCTTTGTTTCACTGA     |
| Exon19 | c.2240_2251 del 12        | p.L747_T751>S        | 6210   | CATGGACAGCCCCAGTGTCCCTCACCTTCGGGGTGCATCGCTGGTAAACATCCACCCAGATCACTGGGCAGCATGTGGCACCATCTCACAATTGCCAGTTAACGTCTTCTTCTCTCTGTGCATAGGGACTGGATCCAGAAAGTGAGAAAGTTAAAATCCCGTGCCTATCAAGGAATCATCTCCGAAAGCCAACAAGGAAATCTCGATGTGAGTTTCTGTTGCTGTGTGGGGTCCATGGCTCTGAACCTCAGGCCACCTTTTCTCATGTCTGGC             |
| Exon19 | c.2240_2254 del 15        | p.L747_T751delLREAT  | 12369  |                                                                                                                                                                                                                                                                                               |
| Exon19 | c.2240_2257 del 18        | p.L747_P753>S        | 12370  |                                                                                                                                                                                                                                                                                               |
| Exon19 | c.2237_2257>TCT           | p.E746_P753>VS       | 18427  |                                                                                                                                                                                                                                                                                               |
| Exon19 | c.2238_2252del15          | p.L747_T751delLREAT  | 23571  |                                                                                                                                                                                                                                                                                               |
| Exon19 | c.2239_2247 del 9         | p.L747_E749del       | 6218   |                                                                                                                                                                                                                                                                                               |
| Exon19 | c.2238_2255 del 18        | p.E746_S752>D        | 6220   |                                                                                                                                                                                                                                                                                               |
| Exon19 | c.2235_2249 del 15        | p.E746_A750delELREA  | 6223   |                                                                                                                                                                                                                                                                                               |
| Exon19 | c.2236_2250 del 15        | p.E746_A750delELREA  | 6225   |                                                                                                                                                                                                                                                                                               |
| Exon19 | c.2239_2253 del 15        | p.L747_T751del       | 6254   |                                                                                                                                                                                                                                                                                               |
| Exon19 | c.2239_2256 del 18        | p.L747_S752delLREATS | 6255   |                                                                                                                                                                                                                                                                                               |
| Exon19 | c.2237_2254 del 18        | p.E746_S752>A        | 12367  |                                                                                                                                                                                                                                                                                               |
| Exon19 | c.2237_2255>T             | p.E746_S752>V        | 12384  |                                                                                                                                                                                                                                                                                               |
| Exon19 | c.2239_2256>CAA           | p.L747_S752>Q        | 12403  |                                                                                                                                                                                                                                                                                               |
| Exon19 | c.2237_2253>TTGCT         | p.E746_T751>VA       | 12416  |                                                                                                                                                                                                                                                                                               |
| Exon19 | c.2235_2255>AAT           | p.E746_S752>I        | 12385  |                                                                                                                                                                                                                                                                                               |
| Exon19 | c.2237_2251 del 15        | p.E746_T751>A        | 12678  |                                                                                                                                                                                                                                                                                               |
| Exon19 | c.2236_2253 del 18        | p.E746_T751delELREAT | 12728  |                                                                                                                                                                                                                                                                                               |
| Exon19 | c.2233_2247del15          | p.K745_E749delKELRE  | 26038  |                                                                                                                                                                                                                                                                                               |
| Exon19 | c.2237_2252>T             | p.E746_T751>V        | 12386  |                                                                                                                                                                                                                                                                                               |
| Exon19 | c.2239_2258>CA            | p.L747_P753>Q        | 12387  |                                                                                                                                                                                                                                                                                               |
| Exon19 | c.2239_2248 TTAAGAGAAG>C  | p.L747_A750>P        | 12382  |                                                                                                                                                                                                                                                                                               |
| Exon19 | c.2239_2251>C             | p.L747_T751>P        | 12383  |                                                                                                                                                                                                                                                                                               |
| Exon19 | c.2238_2252>GCA           | p.L747_T751>Q        | 12419  |                                                                                                                                                                                                                                                                                               |
| Exon19 | c.2238_2248>GC            | p.L747_A750>P        | 12422  |                                                                                                                                                                                                                                                                                               |
| Exon19 | c.2235_2248>AATTC         | p.E746_A750>IP       | 13550  |                                                                                                                                                                                                                                                                                               |
| Exon19 | c.2235_2252>AAT           | p.E746_T751>I        | 13551  |                                                                                                                                                                                                                                                                                               |
| Exon19 | c.2235_2251>AATTC         | p.E746_T751>IP       | 13552  |                                                                                                                                                                                                                                                                                               |
| Exon20 | c.2369C>T                 | p.T790M              | 6240   | AACTGACGTGCTCTCCCTCCCTCCAGGAAGCTACGTGATGGCAGCGTGGACAACCCCAAGCTGTGCGCGCTGTGGGCATCTGCCTCACCTCCACCGTGCAGCTCATATGCAGCTCATGCTCCTTCGGCTGCCTGGACTATGTC                                                                                                                                               |
| Exon20 | c.2303G>T                 | p.S768I              | 6241   | CCATGGGTATTTGAAACTCAAGATCGCATTATCGTCTTCACTGGAAGGGTCCATGTGCCCCTCTTCTGGCCACCATGCGAAGCCACTGACGTGCCTCTCCCTCCCTCCAGGAAGCTACGTGATGGCCATCGTGGACAACCCACAGTGTGCCGCTGTGGGCATCTGCCTCACCTCCACCGTGCAGCTCATCAGCAGCTCATGCCCTTCGGCTGCCTCCGGACTATGCCGGAAACACAAGACAATATGGCTCCCAAGTACCTGCTCAACCATGG              |
| Exon20 | c.2309_2310AC>CCAGCGTGGAT | p.V769_D770insASV    | 13558  | CCATGGTTACCTGGAAGGGTCCATGTGCCCTCTTCTGGCCACCATGCGAAGCCACTGACGTGCCTCTCCCTCCCTCCAGGAAGCTACGTGATGGCCAGCGTGGCCAGCGTGGATAACCCACGTGTGCCGCTGTGGGCACTGTCCCTCACCTCCACCGTGCAGCTCATCAGCAGCTCATGCCCTTCGGCTGCCTCTGGACTATGTCGGGAACACAAGACAATATGGCTCCCAAGTACCTGCTCAACTGGTGTGTGCAGATCGCAAGGTAATCAGGGAAGGGAGATA |
| Exon20 | c.2310_2311insGGT         | p.D770_N771insG      | 12378  | GGGGAGATAAGGAGCCAGGATCTCATATGCGGTTCTGCCTCTGGGATAGCAACCATGG                                                                                                                                                                                                                                    |
| Exon20 | C.2319_2320INSCAC         | P.H773_V774INSH      | 12377  | CCATGGTTACCTGGAAGGGTCCATGTGCCCTCTTCTGGCCACCATGCGAAGCCACTGACGTGCCTCTCCCTCCCTCCAGGAAGCTACGTGATGGCCAGCGTGGACAACCCCAAGTGTGCCGCTGTGGGCATCTGCCTCACCTCCACCGTGCAGCTCATCAGCAGCTCATGCCCTTCGGCTGCCTCTGGACTATGTCGGGAACACAAGACAATATGGCTCCCAAGTACCTGCTCAACTGGTGTGTGCAGATCGCAAGGTAATCAGGGAAGGGAGATAACGGGGA   |
| Exon20 |                           |                      |        | GGGGAGATAAGGAGCCAGGATCTCATATGCGGTTCTGCCTCTGGGATAGCAACCATGG                                                                                                                                                                                                                                    |
| Exon21 | c.2573T>G                 | p.L858R              | 6224   | TTGGAGGACCTCGCTTGGTGACCCGCGACCTGGCAGCCAGGAACCTACTGGTGAACACCCGAGCATGTCAAGATCACAGATTTTGGCGGGCCAACTGCTGGTGGCGAAGAGAAAGTAACATGCAGAAAGGAGGCAAAGT                                                                                                                                                   |
| Exon21 | c.2582T>A                 | p.L861Q              | 6213   | AAGGAGTGGCTTATAGTCAGCAGCATTTTCTGCACCCAGGACGAGGCTGC                                                                                                                                                                                                                                            |
| Exon21 |                           |                      |        | CCATGGCAGGGCATGAACACTTGGAGGACCGTCTGGTGGCACCGACTGGCAGCAAGCACTGCTGGTGAACACCCGAGCATGTCAAGATCACAGATTTTGGGCTGGCCAAACAGCTGGTGGCGAAGAGAAAGATAC                                                                                                                                                       |
| Exon21 |                           |                      |        | CATGCAGAAAGGCAAGTAAGGAGTGGCTTATAGTCAGCAGCATTTTCTGCACCCAGGACGAGGCTGCCTCCCACTAGTGTCCATGG                                                                                                                                                                                                        |

Table S2. Analytical limit of blank (LoB) of dEGFR39 assay-#1 (L858R/L861Q/19del/5768I)

| Num   | Total Number of droplets | L858R/L861Q                                                                 |                             |           | 19Del                                                  |                             |                                                       |                             |           | 5768I                                    |                             |           |
|-------|--------------------------|-----------------------------------------------------------------------------|-----------------------------|-----------|--------------------------------------------------------|-----------------------------|-------------------------------------------------------|-----------------------------|-----------|------------------------------------------|-----------------------------|-----------|
|       |                          | Concentration of L858R <sub>MU</sub> /L861Q <sub>MU</sub> (copies/ $\mu$ l) | Number of positive droplets | Abundance | Concentration of 19Del <sub>MU</sub> (copies/ $\mu$ l) | Number of positive droplets | Concentration of EGFR <sub>WT</sub> (copies/ $\mu$ l) | Number of positive droplets | Abundance | Concentration of 5768I (copies/ $\mu$ l) | Number of positive droplets | Abundance |
| 24513 | 0.07                     | 1                                                                           | 0.0021%                     | 0.14      | 2                                                      | 3385.66                     | 21034                                                 | 0.0041%                     | 0.1       | 2                                        | 0.0041%                     |           |
| 21457 | 0.00                     | 0                                                                           | 0.0000%                     | 0.00      | 0                                                      | 3489.57                     | 18582                                                 | 0.0000%                     | 0.0       | 0                                        | 0.0000%                     |           |
| 22368 | 0.08                     | 1                                                                           | 0.0023%                     | 0.08      | 1                                                      | 3291.53                     | 19012                                                 | 0.0023%                     | 0.1       | 1                                        | 0.0023%                     |           |
| 25478 | 0.13                     | 2                                                                           | 0.0039%                     | 0.00      | 0                                                      | 3404.90                     | 21904                                                 | 0.0000%                     | 0.1       | 1                                        | 0.0020%                     |           |
| 26987 | 0.00                     | 0                                                                           | 0.0000%                     | 0.00      | 0                                                      | 3038.65                     | 22316                                                 | 0.0000%                     | 0.2       | 3                                        | 0.0062%                     |           |
| 24513 | 0.07                     | 1                                                                           | 0.0023%                     | 0.07      | 1                                                      | 2973.82                     | 20103                                                 | 0.0023%                     | 0.1       | 1                                        | 0.0023%                     |           |
| 23235 | 0.22                     | 3                                                                           | 0.0075%                     | 0.29      | 4                                                      | 2942.22                     | 18975                                                 | 0.0100%                     | 0.3       | 4                                        | 0.0100%                     |           |
| 26541 | 0.26                     | 4                                                                           | 0.0082%                     | 0.06      | 1                                                      | 3118.95                     | 22154                                                 | 0.0021%                     | 0.1       | 2                                        | 0.0041%                     |           |
| 25741 | 0.07                     | 1                                                                           | 0.0021%                     | 0.13      | 2                                                      | 3208.30                     | 21698                                                 | 0.0041%                     | 0.0       | 0                                        | 0.0000%                     |           |
| 26985 | 0.00                     | 0                                                                           | 0.0000%                     | 0.00      | 0                                                      | 3194.65                     | 22716                                                 | 0.0000%                     | 0.1       | 1                                        | 0.0020%                     |           |
| 26457 | 0.06                     | 1                                                                           | 0.0018%                     | 0.06      | 1                                                      | 3531.29                     | 23008                                                 | 0.0018%                     | 0.1       | 2                                        | 0.0037%                     |           |
| 21547 | 0.00                     | 0                                                                           | 0.0000%                     | 0.08      | 1                                                      | 3125.89                     | 17989                                                 | 0.0025%                     | 0.0       | 0                                        | 0.0000%                     |           |
| 23548 | 0.14                     | 2                                                                           | 0.0046%                     | 0.07      | 1                                                      | 3170.42                     | 19763                                                 | 0.0023%                     | 0.0       | 0                                        | 0.0000%                     |           |
| 26134 | 0.00                     | 0                                                                           | 0.0000%                     | 0.20      | 3                                                      | 3685.17                     | 23015                                                 | 0.0053%                     | 0.1       | 1                                        | 0.0018%                     |           |
| 23654 | 0.14                     | 2                                                                           | 0.0046%                     | 0.07      | 1                                                      | 3106.19                     | 19709                                                 | 0.0023%                     | 0.1       | 1                                        | 0.0023%                     |           |
| 25854 | 0.00                     | 0                                                                           | 0.0000%                     | 0.07      | 1                                                      | 3226.57                     | 21836                                                 | 0.0020%                     | 0.1       | 2                                        | 0.0041%                     |           |
| 24198 | 0.07                     | 1                                                                           | 0.0020%                     | 0.07      | 1                                                      | 3504.00                     | 20989                                                 | 0.0020%                     | 0.2       | 3                                        | 0.0060%                     |           |
| 25471 | 0.20                     | 3                                                                           | 0.0063%                     | 0.00      | 0                                                      | 3184.68                     | 21415                                                 | 0.0000%                     | 0.1       | 1                                        | 0.0021%                     |           |
| 23654 | 0.07                     | 1                                                                           | 0.0022%                     | 0.14      | 2                                                      | 3283.14                     | 20091                                                 | 0.0044%                     | 0.0       | 0                                        | 0.0000%                     |           |
| 25478 | 0.07                     | 1                                                                           | 0.0022%                     | 0.07      | 1                                                      | 3060.10                     | 21119                                                 | 0.0022%                     | 0.0       | 0                                        | 0.0000%                     |           |

MEAN 0.08 0.08 0.09  
SD 0.078219 0.073543 0.081093  
LoB 0.212 0.201 0.219

Table S3. Analytical limit of blank (LoB) of dEGFR39 assay-#2 (G719X&20ins)

| Num   | Total Number of droplets | G719X                                                  |                             |                                                        |                             |        | 20ins                                                  |                             |                                                       |                             |        |
|-------|--------------------------|--------------------------------------------------------|-----------------------------|--------------------------------------------------------|-----------------------------|--------|--------------------------------------------------------|-----------------------------|-------------------------------------------------------|-----------------------------|--------|
|       |                          | Concentration of G719X <sub>MU</sub> (copies/ $\mu$ l) | Number of positive droplets | Concentration of G719X <sub>WT</sub> (copies/ $\mu$ l) | Number of positive droplets | G719X% | Concentration of 20ins <sub>MU</sub> (copies/ $\mu$ l) | Number of positive droplets | Concentration of EGFR <sub>WT</sub> (copies/ $\mu$ l) | Number of positive droplets | 20ins% |
| 25134 | 0.14                     | 2                                                      | 2262.09                     | 18456                                                  | 0.0060%                     | 0.36   | 5                                                      | 2759.74                     | 20145                                                 | 0.0131%                     |        |
| 22354 | 0.23                     | 3                                                      | 2472.00                     | 17102                                                  | 0.0093%                     | 0.31   | 3                                                      | 2792.82                     | 18002                                                 | 0.0109%                     |        |
| 25436 | 0.07                     | 1                                                      | 2104.26                     | 18023                                                  | 0.0032%                     | 0.20   | 3                                                      | 2671.45                     | 20119                                                 | 0.0075%                     |        |
| 24451 | 0.28                     | 4                                                      | 2098.51                     | 17301                                                  | 0.0133%                     | 0.14   | 2                                                      | 2749.37                     | 19568                                                 | 0.0051%                     |        |
| 26415 | 0.00                     | 0                                                      | 2175.64                     | 19032                                                  | 0.0000%                     | 0.19   | 3                                                      | 2744.27                     | 21124                                                 | 0.0071%                     |        |
| 24513 | 0.14                     | 2                                                      | 2293.56                     | 18119                                                  | 0.0061%                     | 0.14   | 2                                                      | 2724.58                     | 19546                                                 | 0.0051%                     |        |
| 26454 | 0.06                     | 1                                                      | 2156.11                     | 18975                                                  | 0.0030%                     | 0.00   | 0                                                      | 3100.75                     | 22154                                                 | 0.0000%                     |        |
| 26457 | 0.19                     | 3                                                      | 2211.26                     | 19215                                                  | 0.0088%                     | 0.26   | 3                                                      | 2750.86                     | 21178                                                 | 0.0094%                     |        |
| 27846 | 0.06                     | 1                                                      | 2205.50                     | 20198                                                  | 0.0028%                     | 0.00   | 0                                                      | 2722.88                     | 22198                                                 | 0.0000%                     |        |
| 23145 | 0.00                     | 0                                                      | 2518.73                     | 17854                                                  | 0.0000%                     | 0.20   | 2                                                      | 3174.52                     | 19542                                                 | 0.0062%                     |        |
| 21365 | 0.16                     | 2                                                      | 2427.91                     | 16214                                                  | 0.0066%                     | 0.16   | 2                                                      | 2946.63                     | 17564                                                 | 0.0054%                     |        |
| 25648 | 0.13                     | 2                                                      | 2162.74                     | 18425                                                  | 0.0062%                     | 0.09   | 1                                                      | 2313.85                     | 19037                                                 | 0.0038%                     |        |
| 26548 | 0.13                     | 2                                                      | 2328.37                     | 19763                                                  | 0.0055%                     | 0.00   | 0                                                      | 2391.40                     | 20009                                                 | 0.0000%                     |        |
| 23644 | 0.07                     | 1                                                      | 2445.51                     | 18002                                                  | 0.0030%                     | 0.00   | 0                                                      | 2989.55                     | 19542                                                 | 0.0000%                     |        |
| 23655 | 0.14                     | 2                                                      | 2340.45                     | 17652                                                  | 0.0062%                     | 0.14   | 2                                                      | 2754.81                     | 18946                                                 | 0.0052%                     |        |
| 26415 | 0.26                     | 4                                                      | 2422.44                     | 20026                                                  | 0.0107%                     | 0.13   | 2                                                      | 2652.90                     | 20833                                                 | 0.0049%                     |        |

|  |       |      |   |         |       |         |      |   |         |       |         |
|--|-------|------|---|---------|-------|---------|------|---|---------|-------|---------|
|  | 21546 | 0.08 | 1 | 2396.22 | 16254 | 0.0033% | 0.21 | 2 | 2753.68 | 17254 | 0.0077% |
|  | 25416 | 0.20 | 3 | 2337.25 | 18954 | 0.0086% | 0.00 | 0 | 2593.22 | 19854 | 0.0000% |
|  | 23564 | 0.43 | 6 | 2342.42 | 17591 | 0.0186% | 0.07 | 1 | 2655.14 | 18591 | 0.0027% |
|  | 24751 | 0.07 | 1 | 2220.62 | 18013 | 0.0031% | 0.09 | 1 | 2785.99 | 19913 | 0.0033% |

MEAN 0.14 0.13  
SD 0.10388 0.105781  
LOB 0.313 0.309

Table S4. Analytical limit of blank (LoB) of dEGFR39 assay-#3 (T790M/C797S)

| Num | Total Number of droplets | T790M                                            |                             |                                                  |                             |                       | C797S <sup>TRANS</sup>                              |                             |                          | C797S <sup>cis</sup>                              |                             |                          |
|-----|--------------------------|--------------------------------------------------|-----------------------------|--------------------------------------------------|-----------------------------|-----------------------|-----------------------------------------------------|-----------------------------|--------------------------|---------------------------------------------------|-----------------------------|--------------------------|
|     |                          | Concentration of T790M <sub>Mu</sub> (copies/μl) | Number of positive droplets | Concentration of T790M <sub>WT</sub> (copies/μl) | Number of positive droplets | T790M <sub>Mu</sub> % | Concentration of C797S <sup>TRANS</sup> (copies/μl) | Number of positive droplets | C797S <sup>TRANS</sup> % | Concentration of C797S <sup>cis</sup> (copies/μl) | Number of positive droplets | C797S <sup>TRANS</sup> % |
|     | 28139                    | 0.14                                             | 2                           | 2948.54                                          | 20156                       | 0.0047%               | 0.07                                                | 1                           | 0.0024%                  | 0.00                                              | 0                           | 0.0000%                  |
|     | 23548                    | 0.14                                             | 2                           | 3161.41                                          | 19854                       | 0.0046%               | 0.07                                                | 1                           | 0.0023%                  | 0.08                                              | 1                           | 0.0027%                  |
|     | 24254                    | 0.07                                             | 1                           | 2921.49                                          | 19875                       | 0.0024%               | 0.00                                                | 0                           | 0.0000%                  | 0.10                                              | 1                           | 0.0035%                  |
|     | 24368                    | 0.00                                             | 0                           | 2771.41                                          | 19564                       | 0.0000%               | 0.07                                                | 1                           | 0.0025%                  | 0.16                                              | 2                           | 0.0058%                  |
|     | 26541                    | 0.00                                             | 0                           | 2772.51                                          | 21312                       | 0.0000%               | 0.06                                                | 1                           | 0.0023%                  | 0.16                                              | 2                           | 0.0059%                  |
|     | 25412                    | 0.00                                             | 0                           | 2688.88                                          | 20154                       | 0.0000%               | 0.00                                                | 0                           | 0.0000%                  | 0.09                                              | 1                           | 0.0034%                  |
|     | 25538                    | 0.13                                             | 2                           | 2619.60                                          | 20035                       | 0.0051%               | 0.07                                                | 1                           | 0.0026%                  | 0.08                                              | 1                           | 0.0029%                  |
|     | 25417                    | 0.00                                             | 0                           | 3027.35                                          | 21104                       | 0.0000%               | 0.00                                                | 0                           | 0.0000%                  | 0.27                                              | 3                           | 0.0089%                  |
|     | 24785                    | 0.07                                             | 1                           | 2762.77                                          | 19874                       | 0.0025%               | 0.07                                                | 1                           | 0.0025%                  | 0.15                                              | 2                           | 0.0053%                  |
|     | 26541                    | 0.06                                             | 1                           | 2718.86                                          | 21145                       | 0.0024%               | 0.06                                                | 1                           | 0.0024%                  | 0.08                                              | 1                           | 0.0029%                  |
|     | 25465                    | 0.20                                             | 3                           | 2651.07                                          | 20078                       | 0.0076%               | 0.20                                                | 3                           | 0.0076%                  | 0.00                                              | 0                           | 0.0000%                  |
|     | 24351                    | 0.00                                             | 0                           | 2940.82                                          | 20004                       | 0.0000%               | 0.07                                                | 1                           | 0.0024%                  | 0.00                                              | 0                           | 0.0000%                  |
|     | 25741                    | 0.00                                             | 0                           | 2892.54                                          | 21014                       | 0.0000%               | 0.07                                                | 1                           | 0.0023%                  | 0.00                                              | 0                           | 0.0000%                  |
|     | 25644                    | 0.13                                             | 2                           | 2897.32                                          | 20948                       | 0.0046%               | 0.13                                                | 2                           | 0.0046%                  | 0.00                                              | 0                           | 0.0000%                  |
|     | 23655                    | 0.22                                             | 3                           | 2938.30                                          | 19426                       | 0.0074%               | 0.22                                                | 3                           | 0.0074%                  | 0.00                                              | 0                           | 0.0000%                  |
|     | 21245                    | 0.08                                             | 1                           | 3230.77                                          | 18045                       | 0.0025%               | 0.08                                                | 1                           | 0.0025%                  | 0.09                                              | 1                           | 0.0028%                  |
|     | 22543                    | 0.08                                             | 1                           | 2733.13                                          | 17998                       | 0.0028%               | 0.08                                                | 1                           | 0.0028%                  | 0.14                                              | 1                           | 0.0051%                  |
|     | 23254                    | 0.29                                             | 4                           | 2880.70                                          | 18954                       | 0.0102%               | 0.07                                                | 1                           | 0.0025%                  | 0.21                                              | 2                           | 0.0074%                  |
|     | 24152                    | 0.07                                             | 1                           | 2844.80                                          | 19591                       | 0.0025%               | 0.14                                                | 2                           | 0.0050%                  | 0.17                                              | 2                           | 0.0059%                  |
|     | 25241                    | 0.07                                             | 1                           | 2687.13                                          | 20013                       | 0.0025%               | 0.07                                                | 1                           | 0.0025%                  | 0.17                                              | 2                           | 0.0062%                  |

MEAN 0.09 0.08 0.10  
SD 0.082776 0.056485 0.080589  
LoB 0.224 0.173 0.230

Table S5. LoD calculation using probit regression analysis.

|                 |                           | L858R / L861Q | E19 Del | S768I | G719X | E20 ins | T790M | C797S |
|-----------------|---------------------------|---------------|---------|-------|-------|---------|-------|-------|
| 1 fold LoB      | Concentration (copies/μL) | 0.212         | 0.201   | 0.219 | 0.312 | 0.309   | 0.224 | 0.173 |
|                 | % Positive                | 75%           | 60%     | 65%   | 70%   | 55%     | 70%   | 65%   |
|                 | SD                        | 0.09          | 0.073   | 0.086 | 0.078 | 0.091   | 0.067 | 0.072 |
| 1.5 fold LoB    | % Positive                | 95%           | 95%     | 100%  | 100%  | 100%    | 95%   | 95%   |
|                 | SD                        | 0.077         | 0.063   | 0.056 | 0.074 | 0.09    | 0.066 | 0.107 |
| 2 fold LoB      | % Positive                | 100%          | 100%    | 100%  | 100%  | 100%    | 100%  | 100%  |
|                 | SD                        | 0.037         | 0.026   | 0.037 | 0.026 | 0.036   | 0.025 | 0.026 |
| 3 fold LoB      | % Positive                | 100%          | 100%    | 100%  | 100%  | 100%    | 100%  | 100%  |
|                 | SD                        | 0.046         | 0.022   | 0.033 | 0.021 | 0.035   | 0.027 | 0.022 |
| LoD (copies/μL) |                           | 0.339         | 0.305   | 0.311 | 0.434 | 0.457   | 0.333 | 0.349 |

Table S6. FFPE samples detection with dEGFR39 assay-#1 (L858R/L861Q/19del/S768I)

| Num   | ARMS          |         |       | Total Number of droplets | L858R/L861Q                                                                 |                             |                      |           | 19Del                                                  |                             |                      |           |                                                         |                             | S768I                |           |                                          |                             |                      |
|-------|---------------|---------|-------|--------------------------|-----------------------------------------------------------------------------|-----------------------------|----------------------|-----------|--------------------------------------------------------|-----------------------------|----------------------|-----------|---------------------------------------------------------|-----------------------------|----------------------|-----------|------------------------------------------|-----------------------------|----------------------|
|       | L858R / L861Q | E19 del | S768I |                          | Concentration of L858R <sub>MU</sub> /L861Q <sub>MU</sub> (copies/ $\mu$ l) | Number of positive droplets | Relative uncertainty | Abundance | Concentration of 19Del <sub>MU</sub> (copies/ $\mu$ l) | Number of positive droplets | Relative uncertainty | Abundance | Concentration of 19Del <sub>Ref</sub> (copies/ $\mu$ l) | Number of positive droplets | Relative uncertainty | Abundance | Concentration of S768I (copies/ $\mu$ l) | Number of positive droplets | Relative uncertainty |
| CZ-01 | √             |         |       | 26360                    | 32.4                                                                        | 496                         | 9%                   | 21.61%    | 0.06                                                   | 1                           | 196%                 | 149.9     | 2216                                                    | 4%                          | 0.04%                | 0.1       | 1                                        | 196.00%                     | 0.04%                |
| CZ-02 | √             |         |       | 26314                    | 24.4                                                                        | 374                         | 10%                  | 9.81%     | 0.26                                                   | 4                           | 98%                  | 248.5     | 3566                                                    | 3%                          | 0.10%                | 0.0       | 0                                        | inf                         | 0.00%                |
| CZ-03 | √             |         |       | 25325                    | 15.2                                                                        | 224                         | 13%                  | 14.61%    | 0.27                                                   | 4                           | 98%                  | 103.8     | 1494                                                    | 5%                          | 0.26%                | 0.0       | 0                                        | inf                         | 0.00%                |
| CZ-04 |               |         | √     | 24427                    | 0.07                                                                        | 1                           | 196%                 | 0.06%     | 0                                                      | 0                           | inf                  | 109.1     | 1513                                                    | 5%                          | 0.00%                | 6.4       | 91                                       | 20.55%                      | 5.84%                |
| CZ-05 |               |         |       | 23948                    | 0.14                                                                        | 2                           | 139%                 | 0.16%     | 0                                                      | 0                           | inf                  | 87.2      | 1193                                                    | 6%                          | 0.00%                | 0.0       | 0                                        | inf                         | 0.00%                |
| CZ-06 | √             |         |       | 25643                    | 4.93                                                                        | 74                          | 23%                  | 1.72%     | 0.53                                                   | 8                           | 69%                  | 285.6     | 3951                                                    | 3%                          | 0.19%                | 0.0       | 0                                        | inf                         | 0.00%                |
| CZ-07 | √             |         |       | 26204                    | 3.06                                                                        | 47                          | 29%                  | 6.09%     | 0.07                                                   | 1                           | 196%                 | 50.2      | 760                                                     | 7%                          | 0.14%                | 0.1       | 1                                        | 196.00%                     | 0.13%                |
| CZ-08 |               | √       |       | 20962                    | 0.33                                                                        | 4                           | 98%                  | 0.18%     | 23.7                                                   | 289                         | 12%                  | 161.4     | 1891                                                    | 5%                          | 12.80%               | 0.0       | 0                                        | inf                         | 0.00%                |
| CZ-09 | √             |         |       | 24605                    | 33.8                                                                        | 483                         | 9%                   | 24.75%    | 0.14                                                   | 2                           | 139%                 | 136.4     | 1890                                                    | 5%                          | 0.10%                | 0.0       | 0                                        | inf                         | 0.00%                |
| CZ-10 |               | √       |       | 26630                    | 0.32                                                                        | 5                           | 88%                  | 0.30%     | 3.14                                                   | 49                          | 28%                  | 102.9     | 1558                                                    | 5%                          | 2.96%                | 0.2       | 3                                        | 113.16%                     | 0.19%                |
| CZ-11 |               | √       |       | 24498                    | 0.56                                                                        | 8                           | 69%                  | 0.28%     | 47.5                                                   | 672                         | 8%                   | 152       | 2087                                                    | 4%                          | 23.81%               | 0.0       | 0                                        | inf                         | 0.00%                |
| CZ-12 |               |         |       | 25888                    | 0.13                                                                        | 2                           | 139%                 | 0.04%     | 0.4                                                    | 6                           | 80%                  | 292       | 4071                                                    | 3%                          | 0.14%                | 0.0       | 0                                        | inf                         | 0.00%                |
| CZ-13 | √             |         |       | 26597                    | 15.3                                                                        | 238                         | 13%                  | 20.29%    | 0                                                      | 0                           | inf                  | 75.4      | 1150                                                    | 6%                          | 0.00%                | 0.0       | 0                                        | inf                         | 0.00%                |
| CZ-14 |               | √       |       | 25230                    | 0.07                                                                        | 1                           | 196%                 | 0.06%     | 9.97                                                   | 147                         | 16%                  | 112       | 1602                                                    | 5%                          | 8.17%                | 0.1       | 1                                        | 196.00%                     | 0.06%                |
| CZ-15 | √             |         |       | 24219                    | 29.4                                                                        | 413                         | 10%                  | 17.87%    | 0.56                                                   | 8                           | 69%                  | 164       | 2219                                                    | 4%                          | 0.34%                | 0.1       | 1                                        | 196.00%                     | 0.04%                |
| CZ-16 | √             | √       |       | 25536                    | 20                                                                          | 297                         | 11%                  | 43.70%    | 0.53                                                   | 6                           | 80%                  | 45.5      | 672                                                     | 8%                          | 1.16%                | 0.1       | 1                                        | 196.00%                     | 0.15%                |
| CZ-17 | √             |         |       | 25015                    | 9.51                                                                        | 139                         | 17%                  | 4.01%     | 0.2                                                    | 3                           | 113%                 | 236.7     | 3239                                                    | 3%                          | 0.08%                | 0.0       | 0                                        | inf                         | 0.00%                |
| CZ-18 |               | √       |       | 26468                    | 0.06                                                                        | 1                           | 196%                 | 0.05%     | 29.7                                                   | 456                         | 9%                   | 103.3     | 1554                                                    | 5%                          | 22.33%               | 0.0       | 0                                        | inf                         | 0.00%                |
| CZ-19 |               |         |       | 26602                    | 0.13                                                                        | 2                           | 139%                 | 0.12%     | 0.13                                                   | 2                           | 139%                 | 111.7     | 1685                                                    | 5%                          | 0.12%                | 0.0       | 0                                        | inf                         | 0.00%                |
| CZ-20 |               |         |       | 26032                    | 0.2                                                                         | 3                           | 113%                 | 0.07%     | 0.2                                                    | 3                           | 113%                 | 297.7     | 4167                                                    | 3%                          | 0.07%                | 0.1       | 1                                        | 196.00%                     | 0.02%                |
| CZ-21 | √             |         |       | 23849                    | 18.9                                                                        | 263                         | 12%                  | 32.73%    | 0.14                                                   | 2                           | 139%                 | 57.6      | 792                                                     | 7%                          | 0.24%                | 0.0       | 0                                        | inf                         | 0.00%                |
| CZ-22 | √             |         |       | 24680                    | 0.97                                                                        | 14                          | 52%                  | 1.26%     | 0.21                                                   | 3                           | 113%                 | 76.7      | 1084                                                    | 6%                          | 0.27%                | 0.0       | 0                                        | inf                         | 0.00%                |
| CZ-23 |               |         |       | 26103                    | 0.07                                                                        | 1                           | 196%                 | 0.12%     | 0.07                                                   | 1                           | 196%                 | 60.4      | 908                                                     | 7%                          | 0.12%                | 0.1       | 1                                        | 196.00%                     | 0.11%                |
| CZ-24 | √             |         |       | 26401                    | 40.4                                                                        | 617                         | 8%                   | 43.88%    | 0.06                                                   | 1                           | 196%                 | 92        | 1385                                                    | 5%                          | 0.07%                | 0.0       | 0                                        | inf                         | 0.00%                |
| CZ-25 |               |         |       | 24966                    | 0.07                                                                        | 1                           | 196%                 | 0.05%     | 0.27                                                   | 4                           | 98%                  | 133.5     | 1879                                                    | 5%                          | 0.20%                | 0.0       | 0                                        | inf                         | 0.00%                |
| CZ-26 | √             |         |       | 25124                    | 7.9                                                                         | 116                         | 18%                  | 13.13%    | 0.07                                                   | 1                           | 196%                 | 60.1      | 870                                                     | 7%                          | 0.12%                | 0.1       | 2                                        | 138.59%                     | 0.23%                |
| CZ-27 |               | √       |       | 25721                    | 0.2                                                                         | 3                           | 113%                 | 0.07%     | 13.3                                                   | 199                         | 14%                  | 290.3     | 4023                                                    | 3%                          | 4.38%                | 0.0       | 0                                        | inf                         | 0.00%                |
| CZ-28 |               | √       |       | 25547                    | 0.07                                                                        | 1                           | 196%                 | 0.04%     | 72.3                                                   | 1060                        | 6%                   | 107.1     | 1554                                                    | 5%                          | 40.30%               | 0.1       | 2                                        | 138.59%                     | 0.12%                |
| CZ-29 | √             |         |       | 24367                    | 29                                                                          | 410                         | 10%                  | 13.45%    | 0.14                                                   | 2                           | 139%                 | 215.5     | 2890                                                    | 4%                          | 0.06%                | 0.0       | 0                                        | inf                         | 0.00%                |
| CZ-30 |               |         |       | 23780                    | 0.07                                                                        | 1                           | 196%                 | 0.07%     | 0.14                                                   | 2                           | 139%                 | 99.8      | 1351                                                    | 5%                          | 0.14%                | 0.2       | 3                                        | 113.16%                     | 0.22%                |

Table S7. FFPE samples detection with dEGFR39 assay-#2 (G719X&20ins)

| Num | ARMS |  | G719X | 20Ins |
|-----|------|--|-------|-------|
|-----|------|--|-------|-------|

|       | G719X | E20 ins | Total Number of droplets | Concentration of G719X <sub>MU</sub> (copies/μl) | Number of positive droplets | Relative uncertainty | Concentration of G719X <sub>WT</sub> (copies/μl) | Number of positive droplets | Relative uncertainty | G719X% | Concentration of 20ins <sub>MU</sub> (copies/μl) | Number of positive droplets | Relative uncertainty | Concentration of EGFR <sub>WT</sub> (copies/μl) | Number of positive droplets | Relative uncertainty | 20ins% |
|-------|-------|---------|--------------------------|--------------------------------------------------|-----------------------------|----------------------|--------------------------------------------------|-----------------------------|----------------------|--------|--------------------------------------------------|-----------------------------|----------------------|-------------------------------------------------|-----------------------------|----------------------|--------|
| CZ-01 |       |         | 22894                    | 0.22                                             | 3                           | 113%                 | 111                                              | 1441                        | 5%                   | 0.20%  | 0.37                                             | 5                           | 88%                  | 92.5                                            | 1208                        | 6%                   | 0.40%  |
| CZ-02 |       | v       | 28139                    | 0.42                                             | 7                           | 74%                  | 374.5                                            | 5544                        | 3%                   | 0.11%  | 3.79                                             | 47                          | 29%                  | 344.9                                           | 5149                        | 3%                   | 1.10%  |
| CZ-03 |       |         | 25862                    | 0.07                                             | 1                           | 196%                 | 101.9                                            | 1499                        | 5%                   | 0.07%  | 0.13                                             | 2                           | 139%                 | 84.2                                            | 1245                        | 6%                   | 0.15%  |
| CZ-04 | v     |         | 23398                    | 3.87                                             | 53                          | 27%                  | 24.2                                             | 330                         | 11%                  | 13.79% | 0.22                                             | 3                           | 113%                 | 14.1                                            | 193                         | 14%                  | 1.54%  |
| CZ-05 |       | v       | 23575                    | 0.14                                             | 2                           | 139%                 | 44.1                                             | 601                         | 8%                   | 0.32%  | 0.58                                             | 8                           | 69%                  | 39.2                                            | 535                         | 8%                   | 1.46%  |
| CZ-06 |       |         | 24726                    | 0.07                                             | 1                           | 196%                 | 194.5                                            | 2663                        | 4%                   | 0.04%  | 0.21                                             | 3                           | 113%                 | 176.5                                           | 2429                        | 4%                   | 0.12%  |
| CZ-07 |       |         | 24162                    | 0.21                                             | 3                           | 113%                 | 54.5                                             | 760                         | 7%                   | 0.38%  | 0                                                | 0                           | inf                  | 38.9                                            | 544                         | 8%                   | 0.00%  |
| CZ-08 |       |         | 26811                    | 0.19                                             | 3                           | 113%                 | 195.7                                            | 2904                        | 4%                   | 0.10%  | 0.57                                             | 9                           | 65%                  | 172                                             | 2570                        | 4%                   | 0.33%  |
| CZ-09 |       |         | 27706                    | 0.12                                             | 2                           | 139%                 | 219.1                                            | 3338                        | 3%                   | 0.05%  | 0.68                                             | 11                          | 59%                  | 189.2                                           | 2907                        | 4%                   | 0.36%  |
| CZ-10 |       | v       | 23504                    | 0.22                                             | 3                           | 113%                 | 50.9                                             | 691                         | 7%                   | 0.43%  | 0.48                                             | 5                           | 87%                  | 40.5                                            | 551                         | 8%                   | 1.19%  |
| CZ-11 |       |         | 25895                    | 0.2                                              | 3                           | 113%                 | 204.1                                            | 2919                        | 4%                   | 0.10%  | 0.2                                              | 3                           | 113%                 | 181.8                                           | 2616                        | 4%                   | 0.11%  |
| CZ-12 |       |         | 26794                    | 0.13                                             | 2                           | 139%                 | 184.8                                            | 2750                        | 4%                   | 0.07%  | 0.51                                             | 8                           | 69%                  | 160.4                                           | 2403                        | 4%                   | 0.32%  |
| CZ-13 |       |         | 26107                    | 0.07                                             | 1                           | 196%                 | 86.3                                             | 1288                        | 5%                   | 0.08%  | 0.33                                             | 5                           | 88%                  | 72.3                                            | 1083                        | 6%                   | 0.45%  |
| CZ-14 |       |         | 24803                    | 0.21                                             | 3                           | 113%                 | 125.2                                            | 1755                        | 5%                   | 0.17%  | 0.28                                             | 4                           | 98%                  | 110.1                                           | 1550                        | 5%                   | 0.25%  |
| CZ-15 |       |         | 25605                    | 0.13                                             | 2                           | 139%                 | 138.7                                            | 1998                        | 4%                   | 0.09%  | 0                                                | 0                           | inf                  | 121.9                                           | 1765                        | 5%                   | 0.00%  |
| CZ-16 |       | v       | 23248                    | 0.07                                             | 1                           | 196%                 | 155.9                                            | 2029                        | 4%                   | 0.04%  | 0.88                                             | 12                          | 57%                  | 122.1                                           | 1605                        | 5%                   | 0.72%  |
| CZ-17 | v     |         | 26102                    | 0.44                                             | 5                           | 88%                  | 36.1                                             | 546                         | 8%                   | 1.22%  | 0                                                | 0                           | inf                  | 28.5                                            | 433                         | 9%                   | 0.00%  |
| CZ-18 |       |         | 26393                    | 0.06                                             | 1                           | 196%                 | 216.5                                            | 3144                        | 4%                   | 0.03%  | 0.45                                             | 7                           | 74%                  | 193.3                                           | 2826                        | 4%                   | 0.23%  |
| CZ-19 |       |         | 27788                    | 0.12                                             | 2                           | 139%                 | 126.9                                            | 1991                        | 4%                   | 0.09%  | 0.61                                             | 10                          | 62%                  | 115                                             | 1810                        | 5%                   | 0.53%  |
| CZ-20 |       |         | 23357                    | 0.07                                             | 1                           | 196%                 | 120.7                                            | 1595                        | 5%                   | 0.06%  | 0.29                                             | 4                           | 98%                  | 103                                             | 1368                        | 5%                   | 0.28%  |
| CZ-21 |       | v       | 24926                    | 0                                                | 0                           | inf                  | 97.6                                             | 1385                        | 5%                   | 0.00%  | 10.6                                             | 154                         | 16%                  | 76.7                                            | 1096                        | 6%                   | 12.14% |
| CZ-22 |       | v       | 21621                    | 0.08                                             | 1                           | 196%                 | 14.3                                             | 180                         | 15%                  | 0.56%  | 0.32                                             | 4                           | 98%                  | 9.66                                            | 122                         | 18%                  | 3.21%  |
| CZ-23 |       |         | 22183                    | 0.31                                             | 4                           | 98%                  | 141.1                                            | 1760                        | 5%                   | 0.22%  | 1                                                | 13                          | 54%                  | 125.7                                           | 1575                        | 5%                   | 0.79%  |
| CZ-24 |       |         | 21339                    | 0.08                                             | 1                           | 196%                 | 92.4                                             | 1125                        | 6%                   | 0.09%  | 0                                                | 0                           | inf                  | 89.0                                            | 1084                        | 6%                   | 0.00%  |
| CZ-25 |       |         | 22472                    | 0                                                | 0                           | inf                  | 69.4                                             | 896                         | 7%                   | 0.00%  | 0.08                                             | 1                           | 196%                 | 58.2                                            | 754                         | 7%                   | 0.13%  |
| CZ-26 |       |         | 22421                    | 0.15                                             | 2                           | 139%                 | 98.6                                             | 1258                        | 6%                   | 0.15%  | 0                                                | 0                           | inf                  | 88.7                                            | 1136                        | 6%                   | 0.00%  |
| CZ-27 |       |         | 22376                    | 0                                                | 0                           | inf                  | 79.9                                             | 1023                        | 6%                   | 0.00%  | 0.23                                             | 3                           | 113%                 | 74.4                                            | 954                         | 6%                   | 0.31%  |
| CZ-28 |       |         | 22621                    | 0.08                                             | 1                           | 196%                 | 27.8                                             | 365                         | 10%                  | 0.27%  | 0                                                | 0                           | inf                  | 18.7                                            | 247                         | 12%                  | 0.00%  |
| CZ-29 |       |         | 23514                    | 0.07                                             | 1                           | 196%                 | 62.2                                             | 842                         | 7%                   | 0.12%  | 0.07                                             | 1                           | 196%                 | 54.5                                            | 739                         | 7%                   | 0.13%  |
| CZ-30 |       |         | 20218                    | 0                                                | 0                           | inf                  | 187.5                                            | 2103                        | 4%                   | 0.00%  | 0.17                                             | 2                           | 139%                 | 168.0                                           | 1895                        | 5%                   | 0.10%  |

Table S8. FFPE samples detection with dEGFR39 assay-#3 (T790M/C797S)

| Num   | ARMS  |       | Total Number of droplets | T790M                                                  |                             |                      |                                                        |                             |                      | C797S <sub>TRANS</sub> |                                                           |                             |                      |                          |
|-------|-------|-------|--------------------------|--------------------------------------------------------|-----------------------------|----------------------|--------------------------------------------------------|-----------------------------|----------------------|------------------------|-----------------------------------------------------------|-----------------------------|----------------------|--------------------------|
|       | T790M | C797S |                          | Concentration of T790M <sub>Mu</sub> (copies/ $\mu$ l) | Number of positive droplets | Relative uncertainty | Concentration of T790M <sub>WT</sub> (copies/ $\mu$ l) | Number of positive droplets | Relative uncertainty | T790M <sub>Mu</sub> %  | Concentration of C797S <sub>TRANS</sub> (copies/ $\mu$ l) | Number of positive droplets | Relative uncertainty | C797S <sub>TRANS</sub> % |
| CZ-01 |       |       | 24644                    | 0.07                                                   | 1                           | 196%                 | 57.3                                                   | 814                         | 7%                   | 0.12%                  | 0                                                         | 0                           | inf                  | 0.00%                    |
| CZ-02 |       |       | 23847                    | 0.79                                                   | 11                          | 59%                  | 387.9                                                  | 4848                        | 3%                   | 0.20%                  | 0.07                                                      | 1                           | 196%                 | 0.02%                    |
| CZ-03 |       |       | 23660                    | 0.07                                                   | 1                           | 196%                 | 59.6                                                   | 812                         | 7%                   | 0.12%                  | 0.14                                                      | 2                           | 139%                 | 0.24%                    |
| CZ-04 |       |       | 22062                    | 0.08                                                   | 1                           | 196%                 | 105.2                                                  | 1319                        | 5%                   | 0.08%                  | 0                                                         | 0                           | inf                  | 0.00%                    |
| CZ-05 |       |       | 25823                    | 0.07                                                   | 1                           | 196%                 | 45.8                                                   | 684                         | 7%                   | 0.15%                  | 0                                                         | 0                           | inf                  | 0.00%                    |
| CZ-06 |       |       | 20323                    | 0.25                                                   | 3                           | 113%                 | 248.8                                                  | 2757                        | 4%                   | 0.10%                  | 0.08                                                      | 1                           | 196%                 | 0.03%                    |
| CZ-07 |       |       | 24783                    | 0                                                      | 0                           | inf                  | 122.8                                                  | 1721                        | 5%                   | 0.00%                  | 0                                                         | 0                           | inf                  | 0.00%                    |
| CZ-08 | v     |       | 26234                    | 2.47                                                   | 38                          | 32%                  | 239.1                                                  | 3429                        | 3%                   | 1.02%                  | 0.07                                                      | 1                           | 196%                 | 0.03%                    |
| CZ-09 |       |       | 26694                    | 0.45                                                   | 7                           | 74%                  | 325.6                                                  | 4636                        | 3%                   | 0.14%                  | 0.06                                                      | 1                           | 196%                 | 0.02%                    |
| CZ-10 |       |       | 19211                    | 0.09                                                   | 1                           | 196%                 | 105.5                                                  | 1152                        | 6%                   | 0.09%                  | 0                                                         | 0                           | inf                  | 0.00%                    |
| CZ-11 |       |       | 23525                    | 0.36                                                   | 5                           | 88%                  | 275.2                                                  | 3503                        | 3%                   | 0.13%                  | 0                                                         | 0                           | inf                  | 0.00%                    |
| CZ-12 |       |       | 22991                    | 0.15                                                   | 2                           | 139%                 | 102.4                                                  | 1339                        | 5%                   | 0.15%                  | 0.07                                                      | 1                           | 196%                 | 0.07%                    |
| CZ-13 |       |       | 24778                    | 0                                                      | 0                           | inf                  | 49.1                                                   | 703                         | 7%                   | 0.00%                  | 0                                                         | 0                           | inf                  | 0.00%                    |
| CZ-14 |       |       | 22722                    | 0.08                                                   | 1                           | 196%                 | 85                                                     | 1104                        | 6%                   | 0.09%                  | 0                                                         | 0                           | inf                  | 0.00%                    |
| CZ-15 |       |       | 23075                    | 0.07                                                   | 1                           | 196%                 | 192.8                                                  | 2465                        | 4%                   | 0.04%                  | 0                                                         | 0                           | inf                  | 0.00%                    |
| CZ-16 |       |       | 23916                    | 0                                                      | 0                           | inf                  | 72.1                                                   | 989                         | 6%                   | 0.00%                  | 0.07                                                      | 1                           | 196%                 | 0.10%                    |
| CZ-17 |       |       | 22895                    | 0.22                                                   | 3                           | 113%                 | 306.9                                                  | 3768                        | 3%                   | 0.07%                  | 0                                                         | 0                           | inf                  | 0.00%                    |
| CZ-18 |       |       | 22725                    | 0.23                                                   | 3                           | 113%                 | 110.5                                                  | 1425                        | 5%                   | 0.21%                  | 0                                                         | 0                           | inf                  | 0.00%                    |
| CZ-19 |       |       | 22417                    | 0                                                      | 0                           | inf                  | 65.5                                                   | 844                         | 7%                   | 0.00%                  | 0.08                                                      | 1                           | 196%                 | 0.12%                    |
| CZ-20 |       |       | 21110                    | 0.08                                                   | 1                           | 196%                 | 102                                                    | 1225                        | 6%                   | 0.08%                  | 0.08                                                      | 1                           | 196%                 | 0.08%                    |
| CZ-21 |       |       | 25717                    | 0.13                                                   | 2                           | 139%                 | 100.2                                                  | 1466                        | 5%                   | 0.13%                  | 0                                                         | 0                           | inf                  | 0.00%                    |
| CZ-22 |       |       | 21210                    | 0                                                      | 0                           | inf                  | 27.7                                                   | 341                         | 11%                  | 0.00%                  | 0                                                         | 0                           | inf                  | 0.00%                    |
| CZ-23 |       |       | 22523                    | 0.08                                                   | 1                           | inf                  | 150.2                                                  | 1898                        | 5%                   | 0.05%                  | 0.08                                                      | 1                           | 196%                 | 0.05%                    |
| CZ-24 |       |       | 22396                    | 0.08                                                   | 1                           | inf                  | 105.5                                                  | 1342                        | 5%                   | 0.07%                  | 0.08                                                      | 1                           | 196%                 | 0.07%                    |
| CZ-25 |       |       | 24373                    | 0                                                      | 0                           | inf                  | 68.4                                                   | 957                         | 6%                   | 0.00%                  | 0                                                         | 0                           | inf                  | 0.00%                    |
| CZ-26 |       |       | 23622                    | 0.14                                                   | 2                           | inf                  | 108.3                                                  | 1452                        | 5%                   | 0.13%                  | 0.14                                                      | 2                           | 139%                 | 0.13%                    |
| CZ-27 |       |       | 21375                    | 0.08                                                   | 1                           | inf                  | 93.1                                                   | 1135                        | 6%                   | 0.09%                  | 0                                                         | 0                           | inf                  | 0.00%                    |
| CZ-28 |       |       | 22218                    | 0                                                      | 0                           | inf                  | 44.4                                                   | 571                         | 8%                   | 0.00%                  | 0                                                         | 0                           | inf                  | 0.00%                    |
| CZ-29 |       |       | 24296                    | 0.14                                                   | 2                           | inf                  | 65.7                                                   | 917                         | 6%                   | 0.21%                  | 0.07                                                      | 1                           | 196%                 | 0.11%                    |
| CZ-30 |       |       | 22122                    | 0.08                                                   | 1                           | inf                  | 174.1                                                  | 2145                        | 4%                   | 0.04%                  | 0                                                         | 0                           | inf                  | 0.00%                    |

Table S9. The histopathological characteristics of patients

| Feature | n | Tumor EGFR status |
|---------|---|-------------------|
|---------|---|-------------------|



|                                |    | Pos |        | Neg |        | P-Value |
|--------------------------------|----|-----|--------|-----|--------|---------|
|                                |    | n   | %      | n   | %      |         |
| <b>Total</b>                   | 33 | 17  | 51.52% | 16  | 48.48% |         |
| <b>Age</b>                     |    |     |        |     |        |         |
| ≥63                            | 17 | 9   | 27.27% | 8   | 24.24% | 0.866   |
| < 63                           | 16 | 8   | 24.24% | 8   | 24.24% |         |
| <b>Gender</b>                  |    |     |        |     |        |         |
| Male                           | 18 | 10  | 30.30% | 8   | 24.24% | 0.611   |
| Female                         | 15 | 7   | 21.21% | 8   | 24.24% |         |
| <b>Smoking status</b>          |    |     |        |     |        |         |
| Never smoker                   | 21 | 11  | 33.33% | 10  | 30.30% | 0.895   |
| Smoker                         | 12 | 6   | 18.18% | 6   | 18.18% |         |
| <b>Stage</b>                   |    |     |        |     |        |         |
| I-II                           | 19 | 8   | 24.24% | 11  | 33.33% | 0.352   |
| III                            | 4  | 2   | 6.06%  | 2   | 6.06%  |         |
| IV                             | 10 | 7   | 21.21% | 3   | 9.09%  |         |
| <b>Depth of tumor invasion</b> |    |     |        |     |        |         |
| T1                             | 8  | 5   | 15.15% | 3   | 9.09%  | 0.473   |
| T2, T3, T4                     | 25 | 12  | 36.36% | 13  | 39.39% |         |
| <b>N stage</b>                 |    |     |        |     |        |         |
| N0                             | 11 | 5   | 15.15% | 6   | 18.18% | 0.622   |
| N1, N2                         | 22 | 12  | 36.36% | 10  | 30.30% |         |
| <b>Distant metastasis</b>      |    |     |        |     |        |         |
| M0                             | 21 | 9   | 27.27% | 12  | 36.36% | 0.185   |
| M1                             | 12 | 8   | 24.24% | 4   | 12.12% |         |

Table S10. Plasma samples detection with dEGFR39 assay-#1 (L858R/L861Q/19del).

| Num  | ARMS          |         |       | Total Number of droplets | L858R/L861Q                                                           |                             |                      |           | 19Del                                            |                             |                      |                                                   |                             |                      | S768I     |                                    |                             |                      |           |
|------|---------------|---------|-------|--------------------------|-----------------------------------------------------------------------|-----------------------------|----------------------|-----------|--------------------------------------------------|-----------------------------|----------------------|---------------------------------------------------|-----------------------------|----------------------|-----------|------------------------------------|-----------------------------|----------------------|-----------|
|      | L858R / L861Q | E19 del | S768I |                          | Concentration of L858R <sub>MU</sub> /L861Q <sub>MU</sub> (copies/μl) | Number of positive droplets | Relative uncertainty | Abundance | Concentration of 19Del <sub>MU</sub> (copies/μl) | Number of positive droplets | Relative uncertainty | Concentration of 19Del <sub>ref</sub> (copies/μl) | Number of positive droplets | Relative uncertainty | Abundance | Concentration of S768I (copies/μl) | Number of positive droplets | Relative uncertainty | Abundance |
| P-01 |               |         |       | 31310                    | 0                                                                     | 0                           | inf                  | 0.00%     | 0                                                | 0                           | inf                  | 54.4                                              | 743                         | 7%                   | 0.00%     | 0                                  | 0                           | inf                  | 0.00%     |
| P-02 | 1             |         |       | 28303                    | 1.04                                                                  | 13                          | 54%                  | 25.00%    | 0                                                | 0                           | inf                  | 4.16                                              | 52                          | 27%                  | 0.00%     | 0                                  | 0                           | inf                  | 0.00%     |
| P-03 |               |         |       | 23777                    | 0                                                                     | 0                           | inf                  | 0.00%     | 0                                                | 0                           | inf                  | 15.7                                              | 218                         | 13%                  | 0.00%     | 0                                  | 0                           | inf                  | 0.00%     |
| P-04 |               | 1       |       | 21749                    | 0                                                                     | 0                           | inf                  | 0.00%     | 0.47                                             | 6                           | 80%                  | 27.6                                              | 349                         | 10%                  | 1.67%     | 0                                  | 0                           | inf                  | 0.00%     |
| P-05 |               |         |       | 27785                    | 0                                                                     | 0                           | inf                  | 0.00%     | 0                                                | 0                           | inf                  | 42.7                                              | 519                         | 9%                   | 0.00%     | 0                                  | 0                           | inf                  | 0.00%     |
| P-06 |               | 1       |       | 28523                    | 0                                                                     | 0                           | inf                  | 0.00%     | 0.32                                             | 4                           | 98%                  | 13.1                                              | 165                         | 15%                  | 2.38%     | 0                                  | 0                           | inf                  | 0.00%     |
| P-07 | 1             |         |       | 30731                    | 3                                                                     | 54                          | 27%                  | 13.27%    | 0                                                | 0                           | inf                  | 22.6                                              | 304                         | 11%                  | 0.00%     | 0                                  | 0                           | inf                  | 0.00%     |
| P-08 |               |         |       | 27220                    | 0                                                                     | 0                           | inf                  | 0.00%     | 0                                                | 0                           | inf                  | 6.24                                              | 75                          | 23%                  | 0.00%     | 0                                  | 0                           | inf                  | 0.00%     |
| P-09 |               |         |       | 26568                    | 0                                                                     | 0                           | inf                  | 0.00%     | 0                                                | 0                           | inf                  | 24.8                                              | 289                         | 12%                  | 0.00%     | 0                                  | 0                           | inf                  | 0.00%     |
| P-10 |               |         |       | 27077                    | 0                                                                     | 0                           | inf                  | 0.00%     | 0                                                | 0                           | inf                  | 13.9                                              | 166                         | 15%                  | 0.00%     | 0                                  | 0                           | inf                  | 0.00%     |
| P-11 |               |         |       | 26545                    | 0                                                                     | 0                           | inf                  | 0.00%     | 0                                                | 0                           | inf                  | 39.8                                              | 612                         | 8%                   | 0.00%     | 0                                  | 0                           | inf                  | 0.00%     |
| P-12 |               | 1       |       | 31072                    | 0                                                                     | 0                           | inf                  | 0.00%     | 1.09                                             | 15                          | 51%                  | 18.2                                              | 249                         | 12%                  | 5.65%     | 0                                  | 0                           | inf                  | 0.00%     |
| P-13 |               |         |       | 23456                    | 0                                                                     | 0                           | inf                  | 0.00%     | 0                                                | 0                           | inf                  | 20.4                                              | 210                         | 14%                  | 0.00%     | 0                                  | 0                           | inf                  | 0.00%     |
| P-14 |               |         |       | 31273                    | 0                                                                     | 0                           | inf                  | 0.00%     | 0.22                                             | 3                           | 113%                 | 33.9                                              | 465                         | 9%                   | 0.64%     | 0                                  | 0                           | inf                  | 0.00%     |
| P-15 | 1             |         |       | 30731                    | 3.11                                                                  | 56                          | 26%                  | 13.76%    | 0                                                | 0                           | inf                  | 22.6                                              | 404                         | 10%                  | 0.00%     | 0                                  | 0                           | inf                  | 0.00%     |
| P-16 |               |         |       | 27791                    | 0                                                                     | 0                           | inf                  | 0.00%     | 0                                                | 0                           | inf                  | 13.8                                              | 169                         | 15%                  | 0.00%     | 0                                  | 0                           | inf                  | 0.00%     |
| P-17 |               | 1       |       | 25175                    | 0                                                                     | 0                           | inf                  | 0.00%     | 4.55                                             | 67                          | 24%                  | 45.7                                              | 665                         | 8%                   | 9.05%     | 0                                  | 0                           | inf                  | 0.00%     |
| P-18 | 1             |         |       | 27775                    | 0.37                                                                  | 6                           | 80%                  | 1.94%     | 0                                                | 0                           | inf                  | 19.1                                              | 309                         | 11%                  | 0.00%     | 0                                  | 0                           | inf                  | 0.00%     |
| P-19 |               | 1       |       | 26873                    | 0.19                                                                  | 3                           | 113%                 | 0.74%     | 0.25                                             | 3                           | 113%                 | 33.56                                             | 394                         | 10%                  | 0.75%     | 0                                  | 0                           | inf                  | 0.00%     |
| P-20 |               |         |       | 28978                    | 0                                                                     | 0                           | inf                  | 0.00%     | 0.18                                             | 3                           | 113%                 | 23.3                                              | 393                         | 10%                  | 0.77%     | 0                                  | 0                           | inf                  | 0.00%     |
| P-21 | 1             |         |       | 27559                    | 3.66                                                                  | 59                          | 26%                  | 13.56%    | 0.19                                             | 3                           | 113%                 | 26.8                                              | 430                         | 9%                   | 0.70%     | 0                                  | 0                           | inf                  | 0.00%     |
| P-22 |               |         |       | 25003                    | 0                                                                     | 0                           | inf                  | 0.00%     | 0                                                | 0                           | 196%                 | 358                                               | 4731                        | 3%                   | 0.00%     | 0                                  | 0                           | inf                  | 0.00%     |
| P-23 | 1             |         |       | 27890                    | 9.6                                                                   | 118                         | 18%                  | 55.17%    | 0                                                | 0                           | inf                  | 17.4                                              | 213                         | 13%                  | 0.00%     | 0                                  | 0                           | inf                  | 0.00%     |
| P-24 |               |         | 1     | 27181                    | 0.19                                                                  | 3                           | 113%                 | 0.42%     | 0                                                | 0                           | 139%                 | 45.2                                              | 711                         | 7%                   | 0.00%     | 0.33                               | 5                           | 0.877                | 1.15%     |
| P-25 |               | 1       |       | 25798                    | 0                                                                     | 0                           | inf                  | 0.00%     | 0.61                                             | 7                           | 74%                  | 28.5                                              | 323                         | 11%                  | 2.10%     | 0                                  | 0                           | inf                  | 0.00%     |
| P-26 |               |         |       | 17284                    | 0                                                                     | 0                           | inf                  | 0.00%     | 0                                                | 0                           | inf                  | 11.4                                              | 115                         | 18%                  | 0.00%     | 0                                  | 0                           | inf                  | 0.00%     |
| P-27 |               |         |       | 28080                    | 0.49                                                                  | 6                           | 80%                  | 0.87%     | 0                                                | 0                           | inf                  | 56.1                                              | 687                         | 7%                   | 0.00%     | 0                                  | 0                           | inf                  | 0.00%     |
| P-28 |               |         |       | 27324                    | 0                                                                     | 0                           | inf                  | 0.00%     | 0                                                | 0                           | inf                  | 28.6                                              | 454                         | 9%                   | 0.00%     | 0                                  | 0                           | inf                  | 0.00%     |
| P-29 |               |         |       | 16616                    | 0                                                                     | 0                           | inf                  | 0.00%     | 0                                                | 0                           | inf                  | 57.7                                              | 552                         | 8%                   | 0.00%     | 0                                  | 0                           | inf                  | 0.00%     |
| P-30 |               |         |       | 17040                    | 0                                                                     | 0                           | 196%                 | 0.00%     | 0                                                | 0                           | 196%                 | 24                                                | 238                         | 13%                  | 0.00%     | 0                                  | 0                           | inf                  | 0.00%     |
| P-31 |               |         |       | 25731                    | 0                                                                     | 0                           | inf                  | 0.00%     | 0                                                | 0                           | inf                  | 36.4                                              | 543                         | 8%                   | 0.00%     | 0                                  | 0                           | inf                  | 0.00%     |

|      |  |   |  |       |   |   |     |       |      |    |     |       |      |    |       |   |   |     |       |
|------|--|---|--|-------|---|---|-----|-------|------|----|-----|-------|------|----|-------|---|---|-----|-------|
| P-32 |  | 1 |  | 23861 | 0 | 0 | inf | 0.00% | 0.57 | 8  | 69% | 30.8  | 427  | 9% | 1.82% | 0 | 0 | inf | 0.00% |
| P-33 |  | 1 |  | 22135 | 0 | 0 | inf | 0.00% | 6.64 | 86 | 21% | 117.2 | 1469 | 5% | 5.36% | 0 | 0 | inf | 0.00% |

Table S11. Plasma samples detection with dEGFR39 assay-#2 (G719X&20ins)

| Num  | ARMS  |         | Total Number of droplets | G719X                                            |                             |                      |                                                  |                             |                      | 20Ins  |                                                  |                             |                      |                                                   |                             |                      |        |
|------|-------|---------|--------------------------|--------------------------------------------------|-----------------------------|----------------------|--------------------------------------------------|-----------------------------|----------------------|--------|--------------------------------------------------|-----------------------------|----------------------|---------------------------------------------------|-----------------------------|----------------------|--------|
|      | G719X | E20 ins |                          | Concentration of G719X <sub>MU</sub> (copies/μl) | Number of positive droplets | Relative uncertainty | Concentration of G719X <sub>WT</sub> (copies/μl) | Number of positive droplets | Relative uncertainty | G719X% | Concentration of 20Ins <sub>MU</sub> (copies/μl) | Number of positive droplets | Relative uncertainty | Concentration of 20Ins <sub>Ref</sub> (copies/μl) | Number of positive droplets | Relative uncertainty | 20ins% |
| P-01 |       |         | 25415                    | 0                                                | 0                           | inf                  | 36.72                                            | 541                         | 8%                   | 0.00%  | 0                                                | 0                           | inf                  | 38.23                                             | 563                         | 8%                   | 0.00%  |
| P-02 |       |         | 25413                    | 0                                                | 0                           | inf                  | 37.14                                            | 547                         | 8%                   | 0.00%  | 0                                                | 0                           | inf                  | 38.65                                             | 569                         | 8%                   | 0.00%  |
| P-03 |       |         | 22228                    | 0                                                | 0                           | inf                  | 64                                               | 818                         | 7%                   | 0.00%  | 0                                                | 0                           | inf                  | 59.22                                             | 758                         | 7%                   | 0.00%  |
| P-04 |       |         | 29824                    | 0                                                | 0                           | inf                  | 32.4                                             | 424                         | 10%                  | 0.00%  | 0                                                | 0                           | inf                  | 30.84                                             | 534                         | 8%                   | 0.00%  |
| P-05 |       |         | 26870                    | 0                                                | 0                           | inf                  | 33.3                                             | 393                         | 10%                  | 0.00%  | 0                                                | 0                           | inf                  | 25.98                                             | 406                         | 10%                  | 0.00%  |
| P-06 |       |         | 29149                    | 0                                                | 0                           | inf                  | 8.01                                             | 103                         | 19%                  | 0.00%  | 0                                                | 0                           | inf                  | 5.57                                              | 95                          | 20%                  | 0.00%  |
| P-07 |       | 1       | 22704                    | 0                                                | 0                           | inf                  | 18.21                                            | 241                         | 13%                  | 0.00%  | 1.3                                              | 13                          | 54%                  | 18.5                                              | 185                         | 14%                  | 6.57%  |
| P-08 |       |         | 29324                    | 0                                                | 0                           | inf                  | 6.57                                             | 85                          | 21%                  | 0.00%  | 0                                                | 0                           | inf                  | 4.72                                              | 81                          | 22%                  | 0.00%  |
| P-09 |       |         | 28978                    | 0                                                | 0                           | inf                  | 23.5                                             | 396                         | 10%                  | 0.00%  | 0                                                | 0                           | inf                  | 21.57                                             | 364                         | 10%                  | 0.00%  |
| P-10 |       |         | 31046                    | 0                                                | 0                           | inf                  | 10.2                                             | 139                         | 17%                  | 0.00%  | 0                                                | 0                           | inf                  | 6.66                                              | 121                         | 18%                  | 0.00%  |
| P-11 |       |         | 23856                    | 0                                                | 0                           | inf                  | 28.1                                             | 294                         | 11%                  | 0.00%  | 0                                                | 0                           | inf                  | 21.96                                             | 305                         | 11%                  | 0.00%  |
| P-12 |       |         | 23744                    | 0                                                | 0                           | inf                  | 33.3                                             | 459                         | 9%                   | 0.00%  | 0                                                | 0                           | inf                  | 27.54                                             | 380                         | 10%                  | 0.00%  |
| P-13 |       |         | 29162                    | 0                                                | 0                           | inf                  | 24.8                                             | 318                         | 11%                  | 0.00%  | 0                                                | 0                           | inf                  | 17.94                                             | 305                         | 11%                  | 0.00%  |
| P-14 |       |         | 28386                    | 0                                                | 0                           | inf                  | 28.7                                             | 358                         | 10%                  | 0.00%  | 0                                                | 0                           | inf                  | 18.8                                              | 311                         | 11%                  | 0.00%  |
| P-15 |       |         | 26942                    | 0                                                | 0                           | inf                  | 36.9                                             | 576                         | 8%                   | 0.00%  | 0                                                | 0                           | inf                  | 32.68                                             | 511                         | 9%                   | 0.00%  |
| P-16 |       |         | 22541                    | 0                                                | 0                           | inf                  | 96.97                                            | 1245                        | 6%                   | 0.00%  | 0.076                                            | 1                           | 196%                 | 105.24                                            | 1348                        | 5%                   | 0.07%  |
| P-17 |       |         | 27303                    | 0                                                | 0                           | inf                  | 6.74                                             | 78                          | 22%                  | 0.00%  | 0                                                | 0                           | inf                  | 5.38                                              | 86                          | 21%                  | 0.00%  |
| P-18 |       |         | 25417                    | 0                                                | 0                           | inf                  | 23.94                                            | 354                         | 10%                  | 0.00%  | 0                                                | 0                           | inf                  | 23.12                                             | 342                         | 11%                  | 0.00%  |
| P-19 |       |         | 27441                    | 0                                                | 0                           | inf                  | 26                                               | 313                         | 11%                  | 0.00%  | 0                                                | 0                           | inf                  | 20.84                                             | 333                         | 11%                  | 0.00%  |
| P-20 |       |         | 28627                    | 0                                                | 0                           | inf                  | 11.1                                             | 140                         | 17%                  | 0.00%  | 0                                                | 0                           | inf                  | 6.33                                              | 106                         | 19%                  | 0.00%  |
| P-21 |       |         | 27579                    | 0.06                                             | 1                           | 196%                 | 44.6                                             | 712                         | 7%                   | 0.13%  | 0                                                | 0                           | inf                  | 54.32                                             | 864                         | 7%                   | 0.00%  |
| P-22 |       |         | 26548                    | 0                                                | 0                           | inf                  | 87.11                                            | 1321                        | 5%                   | 0.00%  | 0                                                | 0                           | inf                  | 95.25                                             | 1441                        | 5%                   | 0.00%  |
| P-23 |       |         | 33113                    | 0                                                | 0                           | inf                  | 57.1                                             | 825                         | 7%                   | 0.00%  | 0                                                | 0                           | inf                  | 33.94                                             | 652                         | 8%                   | 0.00%  |
| P-24 |       |         | 25801                    | 0                                                | 0                           | inf                  | 14                                               | 211                         | 13%                  | 0.00%  | 0                                                | 0                           | inf                  | 53.48                                             | 796                         | 7%                   | 0.00%  |
| P-25 |       |         | 26010                    | 0                                                | 0                           | inf                  | 48.1                                             | 547                         | 8%                   | 0.00%  | 0                                                | 0                           | inf                  | 43.93                                             | 661                         | 8%                   | 0.00%  |
| P-26 |       |         | 23226                    | 0                                                | 0                           | inf                  | 24.3                                             | 328                         | 11%                  | 0.00%  | 0                                                | 0                           | inf                  | 24.13                                             | 326                         | 11%                  | 0.00%  |
| P-27 |       |         | 25560                    | 0                                                | 0                           | inf                  | 69.6                                             | 1022                        | 6%                   | 0.00%  | 0                                                | 0                           | inf                  | 67.98                                             | 998                         | 6%                   | 0.00%  |
| P-28 |       |         | 28071                    | 0                                                | 0                           | inf                  | 39.5                                             | 643                         | 8%                   | 0.00%  | 0                                                | 0                           | inf                  | 40.17                                             | 653                         | 8%                   | 0.00%  |
| P-29 |       |         | 28812                    | 0                                                | 0                           | inf                  | 76.9                                             | 962                         | 6%                   | 0.00%  | 0                                                | 0                           | inf                  | 60.78                                             | 1008                        | 6%                   | 0.00%  |

|      |  |  |       |   |   |     |       |      |     |       |       |   |      |      |      |     |       |
|------|--|--|-------|---|---|-----|-------|------|-----|-------|-------|---|------|------|------|-----|-------|
| P-30 |  |  | 29198 | 0 | 0 | inf | 108.2 | 1363 | 5%  | 0.00% | 0.058 | 1 | 196% | 85.4 | 1425 | 5%  | 0.07% |
| P-31 |  |  | 19486 | 0 | 0 | inf | 4.3   | 49   | 28% | 0.00% | 0     | 0 | inf  | 16.9 | 192  | 14% | 0.00% |
| P-32 |  |  | 27303 | 0 | 0 | inf | 6.74  | 78   | 22% | 0.00% | 0     | 0 | inf  | 5.45 | 87   | 21% | 0.00% |
| P-33 |  |  | 22580 | 0 | 0 | inf | 6.51  | 86   | 21% | 0.00% | 0     | 0 | inf  | 7.12 | 94   | 20% | 0.00% |

Table S12. Plasma samples detection with dEGFR39 assay-#3 (T790M/C797S)

| Num  | ARMS  |       | Total Number of droplets | T790M                                            |                             |                      |                                                  |                             |                      | C797S <sub>TRANS</sub> |                                                     |                             |                      |                          |
|------|-------|-------|--------------------------|--------------------------------------------------|-----------------------------|----------------------|--------------------------------------------------|-----------------------------|----------------------|------------------------|-----------------------------------------------------|-----------------------------|----------------------|--------------------------|
|      | T790M | C797S |                          | Concentration of T790M <sub>Mu</sub> (copies/μl) | Number of positive droplets | Relative uncertainty | Concentration of T790M <sub>WT</sub> (copies/μl) | Number of positive droplets | Relative uncertainty | T790M <sub>Mu</sub> %  | Concentration of C797S <sub>TRANS</sub> (copies/μl) | Number of positive droplets | Relative uncertainty | C797S <sub>TRANS</sub> % |
| P-01 |       |       | 24722                    | 0                                                | 0                           | inf                  | 43.3                                             | 468                         | 9%                   | 0.00%                  | 0                                                   | 0                           | inf                  | 0.00%                    |
| P-02 |       |       | 28587                    | 0                                                | 0                           | inf                  | 29.3                                             | 487                         | 9%                   | 0.00%                  | 0                                                   | 0                           | inf                  | 0.00%                    |
| P-03 |       |       | 26434                    | 0.34                                             | 4                           | 98%                  | 63.4                                             | 964                         | 6%                   | 0.54%                  | 0.06                                                | 1                           | 196%                 | 0.10%                    |
| P-04 |       |       | 28071                    | 0                                                | 0                           | inf                  | 34.8                                             | 566                         | 8%                   | 0.00%                  | 0                                                   | 0                           | inf                  | 0.00%                    |
| P-05 |       |       | 21203                    | 0                                                | 0                           | inf                  | 29.6                                             | 365                         | 10%                  | 0.00%                  | 0                                                   | 0                           | inf                  | 0.00%                    |
| P-06 | 1     |       | 25127                    | 0.63                                             | 7                           | 74%                  | 7.67                                             | 85                          | 21%                  | 7.59%                  | 0                                                   | 0                           | inf                  | 0.00%                    |
| P-07 |       |       | 30200                    | 0                                                | 0                           | inf                  | 12.4                                             | 165                         | 15%                  | 0.00%                  | 0                                                   | 0                           | inf                  | 0.00%                    |
| P-08 | 1     |       | 25396                    | 0.36                                             | 4                           | 98%                  | 15.6                                             | 174                         | 16%                  | 2.31%                  | 0                                                   | 0                           | inf                  | 0.00%                    |
| P-09 |       |       | 31266                    | 0                                                | 0                           | inf                  | 19.4                                             | 267                         | 12%                  | 0.00%                  | 0                                                   | 0                           | inf                  | 0.00%                    |
| P-10 |       |       | 28558                    | 0.12                                             | 2                           | 139%                 | 9.77                                             | 123                         | 18%                  | 1.21%                  | 0                                                   | 0                           | inf                  | 0.00%                    |
| P-11 |       |       | 17621                    | 0                                                | 0                           | inf                  | 26.7                                             | 274                         | 12%                  | 0.00%                  | 0                                                   | 0                           | inf                  | 0.00%                    |
| P-12 |       |       | 30075                    | 0                                                | 0                           | inf                  | 25.9                                             | 342                         | 11%                  | 0.00%                  | 0                                                   | 0                           | inf                  | 0.00%                    |
| P-13 |       |       | 19566                    | 0                                                | 0                           | inf                  | 20.2                                             | 174                         | 15%                  | 0.00%                  | 0                                                   | 0                           | inf                  | 0.00%                    |
| P-14 |       |       | 30204                    | 0.06                                             | 1                           | 196%                 | 22.4                                             | 298                         | 11%                  | 0.25%                  | 0                                                   | 0                           | inf                  | 0.00%                    |
| P-15 |       |       | 27117                    | 0                                                | 0                           | inf                  | 34.8                                             | 548                         | 8%                   | 0.00%                  | 0                                                   | 0                           | inf                  | 0.00%                    |
| P-16 |       |       | 25530                    | 0                                                | 0                           | inf                  | 77.8                                             | 1137                        | 6%                   | 0.00%                  | 0.07                                                | 1                           | 196%                 | 0.09%                    |
| P-17 |       |       | 16352                    | 0                                                | 0                           | inf                  | 5.4                                              | 39                          | 31%                  | 0.00%                  | 0                                                   | 0                           | inf                  | 0.00%                    |
| P-18 |       |       | 21254                    | 0.32                                             | 3                           | 113%                 | 29.9                                             | 279                         | 12%                  | 1.07%                  | 0                                                   | 0                           | inf                  | 0.00%                    |
| P-19 |       |       | 26873                    | 0                                                | 0                           | inf                  | 25.6                                             | 400                         | 10%                  | 0.00%                  | 0                                                   | 0                           | inf                  | 0.00%                    |
| P-20 |       |       | 27494                    | 0.06                                             | 1                           | 196%                 | 7.75                                             | 94                          | 20%                  | 0.79%                  | 0                                                   | 0                           | inf                  | 0.00%                    |
| P-21 |       |       | 27662                    | 0                                                | 0                           | inf                  | 56                                               | 893                         | 7%                   | 0.00%                  | 0                                                   | 0                           | inf                  | 0.00%                    |
| P-22 |       |       | 25573                    | 0.44                                             | 5                           | 88%                  | 78                                               | 1142                        | 6%                   | 0.56%                  | 0                                                   | 0                           | inf                  | 0.00%                    |
| P-23 |       |       | 22228                    | 0                                                | 0                           | inf                  | 53.2                                             | 682                         | 8%                   | 0.00%                  | 0                                                   | 0                           | inf                  | 0.00%                    |
| P-24 |       |       | 26008                    | 0.07                                             | 1                           | 196%                 | 28.7                                             | 433                         | 9%                   | 0.23%                  | 0                                                   | 0                           | inf                  | 0.00%                    |
| P-25 |       |       | 27579                    | 0                                                | 0                           | inf                  | 42.4                                             | 676                         | 8%                   | 0.00%                  | 0                                                   | 0                           | inf                  | 0.00%                    |
| P-26 |       |       | 17924                    | 0                                                | 0                           | inf                  | 18                                               | 188                         | 14%                  | 0.00%                  | 0                                                   | 0                           | inf                  | 0.00%                    |
| P-27 |       |       | 28080                    | 0                                                | 0                           | inf                  | 56.1                                             | 687                         | 7%                   | 0.00%                  | 0                                                   | 0                           | inf                  | 0.00%                    |
| P-28 |       |       | 27091                    | 0                                                | 0                           | inf                  | 36.5                                             | 573                         | 8%                   | 0.00%                  | 0                                                   | 0                           | inf                  | 0.00%                    |

|      |   |  |       |      |    |     |       |      |     |       |   |   |     |       |
|------|---|--|-------|------|----|-----|-------|------|-----|-------|---|---|-----|-------|
| P-29 | 1 |  | 24267 | 1.59 | 17 | 48% | 148.8 | 2026 | 4%  | 1.07% | 0 | 0 | inf | 0.00% |
| P-30 |   |  | 21305 | 0    | 0  | inf | 137.9 | 1654 | 5%  | 0.00% | 0 | 0 | inf | 0.00% |
| P-31 |   |  | 23719 | 0    | 0  | inf | 4.9   | 68   | 24% | 0.00% | 0 | 0 | inf | 0.00% |
| P-32 |   |  | 18922 | 0    | 0  | inf | 6.87  | 76   | 23% | 0.00% | 0 | 0 | inf | 0.00% |
| P-33 |   |  | 28187 | 0    | 0  | inf | 5.14  | 64   | 25% | 0.00% | 0 | 0 | inf | 0.00% |

Table S13. Dynamic monitor with dEGFR39 panel-#1 (L858R/L861Q/19del)

| Num  | Date | ARMS        |        |       | Total Number of droplets | L858R/L861Q                                                                 |                             |                      |           | 19Del                                                  |                             |                      |           |                                                         |                             | S768I                |           |                                          |                             |                      |
|------|------|-------------|--------|-------|--------------------------|-----------------------------------------------------------------------------|-----------------------------|----------------------|-----------|--------------------------------------------------------|-----------------------------|----------------------|-----------|---------------------------------------------------------|-----------------------------|----------------------|-----------|------------------------------------------|-----------------------------|----------------------|
|      |      | L858R/L861Q | E19del | S768I |                          | Concentration of L858R <sub>MU</sub> /L861Q <sub>MU</sub> (copies/ $\mu$ l) | Number of positive droplets | Relative uncertainty | Abundance | Concentration of 19Del <sub>MU</sub> (copies/ $\mu$ l) | Number of positive droplets | Relative uncertainty | Abundance | Concentration of 19Del <sub>Ref</sub> (copies/ $\mu$ l) | Number of positive droplets | Relative uncertainty | Abundance | Concentration of S768I (copies/ $\mu$ l) | Number of positive droplets | Relative uncertainty |
| P-12 | 0    |             | 1      |       | 31072                    | 0                                                                           | 0                           | inf                  | 0.00%     | 1.09                                                   | 15                          | 51%                  | 18.2      | 249                                                     | 12%                         | 5.65%                | 0         | 0                                        | inf                         | 0.00%                |
|      | 314  |             |        |       | 29828                    | 0                                                                           | 0                           | inf                  | 0.00%     | 0                                                      | 0                           | inf                  | 38.9      | 508                                                     | 9%                          | 0.00%                | 0         | 0                                        | inf                         | 0.00%                |
|      | 444  |             |        |       | 16271                    | 0                                                                           | 0                           | inf                  | 0.00%     | 37.1                                                   | 261                         | 12%                  | 64.9      | 460                                                     | 9%                          | 36.37%               | 0         | 0                                        | inf                         | 0.00%                |
|      | 539  |             |        |       | 29003                    | 0                                                                           | 0                           | inf                  | 0.00%     | 24.7                                                   | 315                         | 11%                  | 65.4      | 826                                                     | 7%                          | 27.41%               | 0         | 0                                        | inf                         | 0.00%                |
| P-15 | 0    | 1           |        |       | 30731                    | 3.11                                                                        | 56                          | 26%                  | 13.76%    | 0                                                      | 0                           | inf                  | 22.6      | 404                                                     | 10%                         | 0.00%                | 0         | 0                                        | inf                         | 0.00%                |
|      | 368  |             |        |       | 29882                    | 0.15                                                                        | 2                           | 139%                 | 1.62%     | 0                                                      | 0                           | inf                  | 9.26      | 122                                                     | 139%                        | 0.00%                | 0         | 0                                        | inf                         | 0.00%                |
|      | 432  |             |        |       | 30529                    | 0.67                                                                        | 9                           | 65%                  | 3.45%     | 0                                                      | 0                           | inf                  | 19.4      | 261                                                     | 65%                         | 0.00%                | 0         | 0                                        | inf                         | 0.00%                |
|      | 489  |             |        |       | 24687                    | 4.96                                                                        | 54                          | 2666%                | 13.97%    | 0                                                      | 0                           | inf                  | 35.5      | 384                                                     | 27%                         | 0.00%                | 0         | 0                                        | inf                         | 0.00%                |
|      | 552  |             |        |       | 25003                    | 15.05                                                                       | 165                         | 14%                  | 42.02%    | 0                                                      | 0                           | inf                  | 35.7      | 472                                                     | 14%                         | 0.00%                | 0         | 0                                        | inf                         | 0.00%                |
| P-23 | 0    | 1           |        |       | 27890                    | 2.61                                                                        | 31                          | 35%                  | 14.94%    | 0                                                      | 0                           | inf                  | 17.4      | 213                                                     | 13%                         | 0.00%                | 0         | 0                                        | inf                         | 0.00%                |
|      | 187  |             |        |       | 30643                    | 0.66                                                                        | 9                           | 65%                  | 4.34%     | 0                                                      | 0                           | inf                  | 15.2      | 205                                                     | 14%                         | 0.00%                | 0         | 0                                        | inf                         | 0.00%                |
|      | 300  | 1           |        |       | 27749                    | 0.65                                                                        | 8                           | 69%                  | 4.39%     | 0                                                      | 0                           | inf                  | 14.8      | 181                                                     | 15%                         | 0.00%                | 0         | 0                                        | inf                         | 0.00%                |
|      | 412  |             |        |       | 26885                    | 2.16                                                                        | 34                          | 34%                  | 2.66%     | 0                                                      | 0                           | inf                  | 81.2      | 1249                                                    | 6%                          | 0.00%                | 0         | 0                                        | inf                         | 0.00%                |
| P-04 | 0    |             | 1      |       | 21749                    | 0                                                                           | 0                           | inf                  | 0.00%     | 0.47                                                   | 6                           | 80%                  | 27.6      | 349                                                     | 10%                         | 1.67%                | 0         | 0                                        | inf                         | 0.00%                |
|      | 95   |             |        |       | 29346                    | 0                                                                           | 0                           | inf                  | 0.00%     | 0.54                                                   | 7                           | 74%                  | 11.4      | 148                                                     | 16%                         | 4.52%                | 0         | 0                                        | inf                         | 0.00%                |
|      | 133  |             |        |       | 26827                    | 0                                                                           | 0                           | inf                  | 0.00%     | 1.7                                                    | 19                          | 45%                  | 18.6      | 219                                                     | 13%                         | 8.37%                | 0         | 0                                        | inf                         | 0.00%                |
|      | 387  |             |        |       | 26942                    | 0                                                                           | 0                           | inf                  | 0.00%     | 3.55                                                   | 56                          | 26%                  | 36.9      | 576                                                     | 8%                          | 8.78%                | 0         | 0                                        | inf                         | 0.00%                |
| P-25 | 0    |             | 1      |       | 25798                    | 0                                                                           | 0                           | inf                  | 0.00%     | 0.61                                                   | 7                           | 74%                  | 28.5      | 323                                                     | 11%                         | 2.10%                | 0         | 0                                        | inf                         | 0.00%                |
|      | 194  |             |        |       | 31849                    | 0                                                                           | 0                           | inf                  | 0.00%     | 0                                                      | 0                           | inf                  | 39.1      | 546                                                     | 8%                          | 0.00%                | 0         | 0                                        | inf                         | 0.00%                |
|      | 251  |             |        |       | 30274                    | 0                                                                           | 0                           | inf                  | 0.00%     | 1                                                      | 13                          | 54%                  | 17.2      | 229                                                     | 13%                         | 5.49%                | 0         | 0                                        | inf                         | 0.00%                |
|      | 294  |             |        |       | 27174                    | 0                                                                           | 0                           | inf                  | 0.00%     | 15.2                                                   | 176                         | 15%                  | 94.4      | 1110                                                    | 6%                          | 13.87%               | 0         | 0                                        | inf                         | 0.00%                |
| P-07 | 0    | 1           |        |       | 30731                    | 3.03                                                                        | 41                          | 31%                  | 13.27%    | 0                                                      | 0                           | inf                  | 22.6      | 404                                                     | 10%                         | 0.00%                | 0         | 0                                        | inf                         | 0.00%                |
|      | 452  |             |        |       | 24078                    | 1.13                                                                        | 12                          | 57%                  | 5.31%     | 0                                                      | 0                           | inf                  | 21.3      | 226                                                     | 13%                         | 0.00%                | 0         | 0                                        | inf                         | 0.00%                |
|      | 581  |             |        |       | 32345                    | 0.35                                                                        | 5                           | 88%                  | 6.67%     | 0                                                      | 0                           | inf                  | 5.25      | 75                                                      | 23%                         | 0.00%                | 0         | 0                                        | inf                         | 0.00%                |
|      | 666  |             |        |       | 27775                    | 0.37                                                                        | 6                           | 80%                  | 1.94%     | 0                                                      | 0                           | inf                  | 19.1      | 309                                                     | 11%                         | 0.00%                | 0         | 0                                        | inf                         | 0.00%                |

Table S14. Dynamic monitor with dEGFR39 panel-#2 (G719X&amp;20Ins)

| Num  | Day | ARMS  |         | Total Number of droplets | G719X                                            |                             |                      |                                                  |                             |                      | 20Ins  |                                                  |                             |                      |                                                   |                             |                      |        |
|------|-----|-------|---------|--------------------------|--------------------------------------------------|-----------------------------|----------------------|--------------------------------------------------|-----------------------------|----------------------|--------|--------------------------------------------------|-----------------------------|----------------------|---------------------------------------------------|-----------------------------|----------------------|--------|
|      |     | G719X | E20 ins |                          | Concentration of G719X <sub>MU</sub> (copies/μl) | Number of positive droplets | Relative uncertainty | Concentration of G719X <sub>WT</sub> (copies/μl) | Number of positive droplets | Relative uncertainty | G719X% | Concentration of 20Ins <sub>MU</sub> (copies/μl) | Number of positive droplets | Relative uncertainty | Concentration of 20Ins <sub>Ref</sub> (copies/μl) | Number of positive droplets | Relative uncertainty | 20ins% |
| P-12 | 0   |       |         | 23744                    | 0                                                | 0                           | inf                  | 33.30                                            | 459                         | 9%                   | 0.00%  | 0                                                | 0                           | inf                  | 27.54                                             | 380                         | 10%                  | 0.00%  |
|      | 314 |       |         | 24516                    | 0                                                | 0                           | inf                  | 52.67                                            | 745                         | 7%                   | 0.00%  | 0                                                | 0                           | inf                  | 46.15                                             | 654                         | 8%                   | 0.00%  |
|      | 444 |       |         | 25648                    | 0                                                | 0                           | inf                  | 40.74                                            | 605                         | 8%                   | 0.00%  | 0                                                | 0                           | inf                  | 37.75                                             | 561                         | 8%                   | 0.00%  |
|      | 539 |       |         | 23698                    | 0                                                | 0                           | inf                  | 30.01                                            | 413                         | 10%                  | 0.00%  | 0                                                | 0                           | inf                  | 25.69                                             | 354                         | 10%                  | 0.00%  |
| P-15 | 0   |       |         | 26942                    | 0                                                | 0                           | inf                  | 36.90                                            | 576                         | 8%                   | 0.00%  | 0                                                | 0                           | inf                  | 32.68                                             | 511                         | 9%                   | 0.00%  |
|      | 368 |       |         | 21456                    | 0                                                | 0                           | inf                  | 41.55                                            | 516                         | 9%                   | 0.00%  | 0                                                | 0                           | inf                  | 47.51                                             | 589                         | 8%                   | 0.00%  |
|      | 432 |       |         | 21546                    | 0                                                | 0                           | inf                  | 27.63                                            | 346                         | 11%                  | 0.00%  | 0                                                | 0                           | inf                  | 26.18                                             | 328                         | 11%                  | 0.00%  |
|      | 489 |       |         | 25874                    | 0                                                | 0                           | inf                  | 26.66                                            | 401                         | 10%                  | 0.00%  | 0                                                | 0                           | inf                  | 27.60                                             | 415                         | 10%                  | 0.00%  |
|      | 552 |       |         | 21368                    | 0                                                | 0                           | inf                  | 33.80                                            | 419                         | 10%                  | 0.00%  | 0                                                | 0                           | inf                  | 29.32                                             | 364                         | 10%                  | 0.00%  |
| P-23 | 0   |       |         | 33113                    | 0                                                | 0                           | inf                  | 57.10                                            | 825                         | 7%                   | 0.00%  | 0                                                | 0                           | inf                  | 33.94                                             | 652                         | 8%                   | 0.00%  |
|      | 187 |       |         | 25746                    | 0                                                | 0                           | inf                  | 27.06                                            | 405                         | 10%                  | 0.00%  | 0                                                | 0                           | inf                  | 30.57                                             | 457                         | 9%                   | 0.00%  |
|      | 300 |       |         | 23654                    | 0                                                | 0                           | inf                  | 29.55                                            | 406                         | 10%                  | 0.00%  | 0                                                | 0                           | inf                  | 26.54                                             | 365                         | 10%                  | 0.00%  |
|      | 412 |       |         | 25648                    | 0                                                | 0                           | inf                  | 20.15                                            | 301                         | 11%                  | 0.00%  | 0                                                | 0                           | inf                  | 14.30                                             | 214                         | 13%                  | 0.00%  |
| P-04 | 0   |       |         | 29824                    | 0                                                | 0                           | inf                  | 32.40                                            | 424                         | 10%                  | 0.00%  | 0                                                | 0                           | inf                  | 30.84                                             | 534                         | 8%                   | 0.00%  |
|      | 95  |       |         | 22214                    | 0                                                | 0                           | inf                  | 19.01                                            | 246                         | 12%                  | 0.00%  | 0                                                | 0                           | inf                  | 12.96                                             | 168                         | 15%                  | 0.00%  |
|      | 133 |       |         | 25541                    | 0                                                | 0                           | inf                  | 20.57                                            | 306                         | 11%                  | 0.00%  | 0                                                | 0                           | inf                  | 16.59                                             | 247                         | 12%                  | 0.00%  |
|      | 387 |       |         | 23684                    | 0                                                | 0                           | inf                  | 51.06                                            | 698                         | 7%                   | 0.00%  | 0                                                | 0                           | inf                  | 54.10                                             | 739                         | 7%                   | 0.00%  |
| P-25 | 0   |       |         | 26010                    | 0                                                | 0                           | inf                  | 48.10                                            | 547                         | 8%                   | 0.00%  | 0                                                | 0                           | inf                  | 43.93                                             | 661                         | 8%                   | 0.00%  |
|      | 194 |       |         | 22214                    | 0                                                | 0                           | inf                  | 24.56                                            | 365                         | 10%                  | 0.00%  | 0                                                | 0                           | inf                  | 12.96                                             | 168                         | 15%                  | 0.00%  |
|      | 251 |       |         | 25541                    | 0                                                | 0                           | inf                  | 21.18                                            | 301                         | 11%                  | 0.00%  | 0                                                | 0                           | inf                  | 16.59                                             | 247                         | 12%                  | 0.00%  |
|      | 294 |       |         | 23684                    | 0                                                | 0                           | inf                  | 22.58                                            | 334                         | 11%                  | 0.00%  | 0                                                | 0                           | inf                  | 54.10                                             | 739                         | 7%                   | 0.00%  |
| P-07 | 0   |       |         | 21854                    | 0                                                | 0                           | inf                  | 17.74                                            | 226                         | 13%                  | 0.00%  | 0                                                | 0                           | inf                  | 9.71                                              | 124                         | 18%                  | 0.00%  |
|      | 452 |       | 1       | 22704                    | 0                                                | 0                           | inf                  | 18.21                                            | 241                         | 13%                  | 0.00%  | 1.3                                              | 13                          | 54%                  | 18.50                                             | 185                         | 14%                  | 6.57%  |
|      | 581 |       |         | 22365                    | 0                                                | 0                           | inf                  | 17.26                                            | 225                         | 13%                  | 0.00%  | 0                                                | 0                           | inf                  | 14.48                                             | 189                         | 14%                  | 0.00%  |
|      | 666 |       |         | 25421                    | 0                                                | 0                           | inf                  | 21.89                                            | 324                         | 11%                  | 0.00%  | 0                                                | 0                           | inf                  | 17.14                                             | 254                         | 12%                  | 0.00%  |

Table S15. Dynamic monitor with dEGFR39 panel-#3 (T790M/ C797S)

| Num  | Day | ARMS  |       | Total Number of droplets | T790M                                            |                             |                      |                                                  |                             |                      | C797S <sub>TRANS</sub> |                                                     |                             |                      |                          |
|------|-----|-------|-------|--------------------------|--------------------------------------------------|-----------------------------|----------------------|--------------------------------------------------|-----------------------------|----------------------|------------------------|-----------------------------------------------------|-----------------------------|----------------------|--------------------------|
|      |     | T790M | C797S |                          | Concentration of T790M <sub>MU</sub> (copies/μl) | Number of positive droplets | Relative uncertainty | Concentration of T790M <sub>WT</sub> (copies/μl) | Number of positive droplets | Relative uncertainty | T790M <sub>MU</sub> %  | Concentration of C797S <sub>TRANS</sub> (copies/μl) | Number of positive droplets | Relative uncertainty | C797S <sub>TRANS</sub> % |
| P-12 | 0   |       |       | 30075                    | 0                                                | 0                           | inf                  | 25.9                                             | 342                         | 11%                  | 0.00%                  | 0                                                   | 0                           | inf                  | 0.00%                    |
|      | 314 |       |       | 27657                    | 0                                                | 0                           | inf                  | 30.4                                             | 369                         | 10%                  | 0.00%                  | 0                                                   | 0                           | inf                  | 0.00%                    |
